1           **Continuous and bolus intraventricular topotecan prolong survival in a mouse**  
2                                   **model of leptomeningeal medulloblastoma**

3  
4     Shackleford, GM,<sup>1\*</sup> Mahdi, MY,<sup>1</sup> Moats, RA,<sup>1</sup> Debra Hawes,<sup>2</sup> Tran, HC,<sup>3,#a</sup> Hoang, T,<sup>4</sup> Meng, E,<sup>4,5</sup>  
5                                                             and Erdreich-Epstein, A<sup>2,3,6\*</sup>

6  
7     <sup>1</sup>Department of Radiology, The Saban Research Institute, Children’s Hospital Los Angeles, Los  
8     Angeles, California 90027, USA

9  
10    <sup>2</sup>Department of Pathology, Children’s Hospital Los Angeles and Keck School of Medicine,  
11    University of Southern California, Los Angeles, California 90027, USA

12  
13    <sup>3</sup>Division of Hematology, Oncology and Blood & Marrow Transplantation, Department of Pediatrics,  
14    The Saban Research Institute, Children’s Hospital Los Angeles, Los Angeles, California 90027,  
15    USA

16  
17    <sup>4</sup>Department of Biomedical Engineering, University of Southern California, Los Angeles, California  
18    90089, USA

19  
20    <sup>5</sup>Ming Hsieh Department of Electrical Engineering, University of Southern California, Los Angeles,  
21    California 90089, USA

22  
23    <sup>6</sup>Norris Comprehensive Cancer Center, Keck School of Medicine, University of Southern  
24    California, Los Angeles, California 90027, USA

25  
26    <sup>#a</sup> Current address: Division of Pediatric Hematology/Oncology, Kaiser Permanente Central Bay,  
27    Oakland California 94611, USA

28  
29    \*Corresponding authors:       [epstein@usc.edu](mailto:epstein@usc.edu)       and       [shacklef@usc.edu](mailto:shacklef@usc.edu)

30  
31    **Short title:** Continuous versus bolus intraventricular topotecan in a leptomeningeal  
32                                   medulloblastoma model in mice

33  
34    **Abbreviations:** CSF – cerebrospinal fluid; IP – intraperitoneal; IVT – intraventricular; TPT –  
35                                   topotecan

## 36 **Abstract**

37 Leptomeningeal metastasis remains a difficult clinical challenge. Some success has been  
38 achieved by direct administration of therapeutics into the cerebrospinal fluid (CSF) circumventing  
39 limitations imposed by the blood brain barrier. Here we investigated continuous infusion versus  
40 bolus injection of therapy into the CSF in a preclinical model of human Group 3 medulloblastoma,  
41 the molecular subgroup with the highest incidence of leptomeningeal disease. Initial tests of  
42 selected Group 3 human medulloblastoma cell lines in culture showed that D283 Med and D425  
43 Med were resistant to cytarabine and methotrexate. D283 Med cells were also resistant to  
44 topotecan, whereas 1  $\mu$ M topotecan killed over 99% of D425 Med cells. We therefore introduced  
45 D425 Med cells, modified to express firefly luciferase, into the CSF of immunodeficient mice. Mice  
46 were then treated with topotecan or saline in five groups: continuous intraventricular (IVT)  
47 topotecan via osmotic pump (5.28  $\mu$ g/day), daily bolus IVT topotecan injections with a similar daily  
48 dose (6  $\mu$ g/day), systemic intraperitoneal injections of a higher daily dose of topotecan (15  
49  $\mu$ g/day), daily IVT pumped saline and daily intraperitoneal injections of saline. Bioluminescence  
50 analyses revealed that both IVT topotecan treatments effectively slowed leptomeningeal tumor  
51 growth in the brains, although histological analysis showed that they were associated with  
52 localized brain necrosis. In the spines, bolus IVT topotecan showed a trend towards slower tumor  
53 growth compared to continuous (pump) IVT topotecan, as measured by bioluminescence. Both  
54 continuous and bolus topotecan IVT showed similar survival that was longer compared to other  
55 groups. Thus, both direct IVT topotecan CSF delivery methods produced better anti-  
56 medulloblastoma effect compared to systemic therapy at the dosages used here.

57

58 KEY WORDS: cerebrospinal fluid (CSF); intraventricular; leptomeningeal tumor;  
59 medulloblastoma; topotecan

## 60 Introduction

61 Medulloblastomas are the most common malignant brain cancers in children, in whom brain  
62 tumors constitute the most common solid cancer [1]. Leptomeningeal dissemination of  
63 medulloblastoma, i.e., dissemination to the arachnoid, pia and cerebrospinal fluid (CSF), can  
64 occur in up to 40% of medulloblastoma patients at diagnosis and is found in most at recurrence  
65 [2-4]. Leptomeningeal medulloblastoma poses a dual challenge: 1) patients face poor prognosis  
66 despite intensive therapy, and 2) the small proportion of cured patients suffer serious long-term  
67 treatment-related sequelae, causing impaired quality of life and a serious burden to society, to  
68 their families and to themselves [1, 2, 5, 6]. Thus, leptomeningeal medulloblastoma requires  
69 development of more effective therapy.

70  
71 The poor prognosis of leptomeningeal medulloblastoma is partially due to the challenge of  
72 delivering drugs effectively into the CSF [7]. These challenges include 1) the blood brain barrier,  
73 which prevents achievement of therapeutic CSF levels with systemic use of many drugs unless  
74 used at high doses that cause unacceptable systemic toxicity [7], and 2) direct intrathecal drug  
75 delivery via infrequent lumbar punctures that may provide only limited leptomeningeal exposure  
76 [8], especially in view of the rapid CSF turnover (6 h in humans, 2 h in mice), rapid drug clearance  
77 and uneven distribution in the CSF [9, 10]. Nevertheless, delivery of drugs directly into the CSF  
78 can be an attractive modality due to the greater therapeutic concentrations in CSF that can be  
79 achieved with significantly lower systemic exposure and fewer systemic side effects [7]. Thus, it  
80 is thought that improved delivery of drugs to the CSF will be beneficial.

81  
82 A Phase I clinical trial found that continuous intrathecal infusion of topotecan, a topoisomerase I  
83 inhibitor, was well tolerated, suggesting that such an approach may help to circumvent some of  
84 the challenges in treatment of leptomeningeal disease [11]. A relevant question is whether such

85 delivery is safe and effective and whether the preferred schedule is bolus or continuous. We  
86 therefore compared efficacy of topotecan delivered directly into the CSF as daily bolus injection  
87 with similarly-delivered topotecan as continuous infusion, using a mouse model of human  
88 leptomeningeal Group 3 medulloblastoma. Here we report that continuous and bolus IVT  
89 topotecan into mice with leptomeningeal medulloblastoma yielded similar survival advantage,  
90 similar improved control of brain leptomeningeal spread and mild advantage in control of spine  
91 leptomeningeal disease for the bolus treatment. We also find that both IVT topotecan delivery  
92 methods were associated with localized brain necrosis. We discuss possible limitations and  
93 approaches to improve the efficacy of topotecan delivery into the CSF.

94

95

## 96 **Materials and methods**

### 97 **Cells**

98 D425 Med medulloblastoma cells were a gift from Dr. Darrell D. Bigner (Duke University, Durham,  
99 NC) [12]. These cells were transduced with SMPU-R-MND lentiviral vector [13, 14] containing  
100 firefly luciferase and stable clones were selected by limiting dilutions and subsequent luciferase  
101 assay. D283 Med medulloblastoma cells stably expressing firefly luciferase in  
102 Luc(ff):zeocin/pcDNA3.1(+) (pJ00778) following selection in zeocin were a gift from Dr. Michael  
103 Jensen [15]. Both lines are classified as belonging to molecular subgroup 3 of medulloblastoma  
104 [16-20]. D425 were cultured in Ham's F-12 medium containing 10% fetal bovine serum in a 37°C,  
105 5% CO<sub>2</sub> incubator. D283 were cultured in DMEM medium containing 10% fetal bovine serum and  
106 0.6 mg/ml zeocin. Cell lines were negative for mycoplasma and were authenticated by small  
107 tandem repeats in November 2017.

108  
109 Treatment of cultured cells with chemotherapy was performed as described in the legend to  
110 Figure 1. Bioluminescence was measured using a luminometer (Promega GloMax) after  
111 automatic injection of 100 µl of D-luciferin (0.33 mg/ml) into wells containing 100 µl of medium  
112 and cells.

113

### 114 **Reagents**

115 Cytarabine, methotrexate and topotecan were purchased through the Children's Hospital Los  
116 Angeles pharmacy. D-luciferin was from Biosynth International, Inc.

117

### 118 **Mice**

119 Mice were housed at The Saban Research Institute of Children's Hospital Los Angeles, a facility  
120 accredited by the Association for Assessment and Accreditation of Laboratory Animal Care  
121 International. All mouse procedures were approved by the Children's Hospital Los Angeles  
122 Institutional Animal Care and Use Committee (protocol number 190) and were performed in strict  
123 accordance with recommendations of the latest (eighth) edition of the *Guide for the Care and Use*  
124 *of Laboratory Animals*.

125  
126 Mice used were female J:NU mice (homozygous for the *Foxn1<sup>nu</sup>* mutation; The Jackson  
127 Laboratory). Mice in the intraventricular (IVT) treatment groups were cannulated by the vendor at  
128 age 8 weeks into the lateral ventricle according to the vendor's standard coordinates. Mice in the  
129 bolus IVT treatment group were implanted with standard straight cannulas (PlasticsOne, 26  
130 gauge, cat# C315GS-5/SPC), and mice in the IVT osmotic pump group received 28 gauge cat#  
131 3280PM/SPC cannulas. Mice were shipped at age 9 weeks.

132  
133 On the first day of the experiment D425-ff-luc medulloblastoma cells ( $2 \times 10^5$  saline-washed cells  
134 in 2  $\mu$ l per mouse) were injected into the cisterna magna of the mice while they were under  
135 ketamine/xylazine anesthesia. In mice receiving osmotic pumps, this injection was immediately  
136 followed by subcutaneous implantation of the drug- or saline-containing pumps, which were  
137 connected to the IVT cannulas via short catheter tubing. These catheters contained saline so as  
138 to delay the start of drug entry into the CSF until the day following implantation, a time when the  
139 other treatments were also scheduled to begin. Analgesia was provided by ketoprofen prior to  
140 cisterna magna injection and followed by ibuprofen in the drinking water after injection. Treatment  
141 was daily for bolus-treated mice for the duration of the experiment with IVT injections being given  
142 over 3 minutes each time, or continuously for mice with pumps for a minimum of 28 days. We  
143 used model 2004 Alzet osmotic pumps, which have a reservoir of 200  $\mu$ l, a target pumping rate

144 of 0.25  $\mu$ l per hour and a pumping duration of at least 28 days. The lot of pumps used in this  
145 experiment was measured by the manufacturer to average 0.22  $\mu$ l per hour.

146

147 Mice were observed daily by laboratory personnel and animal facility personnel, all of whom are  
148 trained to recognize symptoms requiring euthanasia. All efforts were made to alleviate potential  
149 animal discomfort. Euthanasia was performed when mice showed signs of tumor or illness such  
150 as head tilt or other neurological deficits, hydrocephalus, abnormal posture or movement,  
151 lethargy, rough coat, abnormal breathing, weight loss, or other signs of distress. These endpoints  
152 for euthanasia and the cranial localization of medulloblastoma tumors precluded their size from  
153 exceeding the currently recommended limits for tumor size in mice. Euthanasia was performed  
154 by isoflurane inhalation until mice were deeply anesthetized and their respiration ceases followed  
155 by perfusion with normal saline.

156

157 Bioluminescence imaging (Xenogen IVIS<sup>®</sup> 100) of mice was performed twice weekly under  
158 isoflurane anesthesia after an intraperitoneal (IP) injection of D-luciferin (75 mg/kg body weight)  
159 as described [21]. Bioluminescence (radiance) is presented in the figures as  
160 photons/sec/cm<sup>2</sup>/steradian.

161

## 162 **Pathology**

163 Mice were perfused with phosphate buffered saline and brains and spines were fixed in formalin  
164 overnight, paraffin-embedded, sectioned and stained with hematoxylin and eosin.

165

166

## 167 **Results**

168 Medulloblastomas from molecular subgroup 3 are the ones most often found to have  
169 leptomeningeal spread [4, 22]. To choose human medulloblastoma cell lines for use in our  
170 leptomeningeal spread model we first tested chemosensitivity in culture of luciferase-expressing  
171 isolates of two medulloblastoma cell lines considered to belong to subgroup 3, D283 Med and  
172 D425 Med. We tested each line's sensitivity to three chemotherapy drugs that can be used  
173 intrathecally: methotrexate, topotecan and cytarabine (ARA-C; Fig 1A-B). [23-28] Of the two cell  
174 lines both were resistant to methotrexate. D425 was only mildly sensitive to cytarabine (50%±6,  
175 SEM, cell kill at 250 µg/ml), and D283 showed resistance to it. For D425, incubation with 10 µg/ml  
176 topotecan for 3 days achieved 98%±0.2 cell kill, whereas D283 showed less than 50% cytotoxicity  
177 under those conditions. Upon comparing the sensitivity of three different clones of luciferase-  
178 expressing D425 to topotecan we found that all clones were similarly sensitive (Fig 1C) such that  
179 0.1 µg/ml topotecan for four days induced 97-99% cell kill as measured by luciferase  
180 bioluminescence. We chose Clone #5 of D425 for the *in vivo* experiments.

181

182 **Fig 1. D425MED cells, but not D283MED, are sensitive to topotecan in culture. (A-B)**  
183 D283 and clone 5 of D425 medulloblastoma cells, expressing firefly luciferase, were  
184 seeded at  $2 \times 10^3$  cells/well into 96-well plates, and methotrexate (MTX), cytarabine (ARA-  
185 C) or topotecan (TPT) were added for 72 h. Cells were analyzed for residual  
186 bioluminescence (Radiance) as a measurement of cells surviving following treatment.  
187 Data are the averages of duplicate measurements of duplicate wells ±SEM. **(C)** D425  
188 clones 4, 5 and 7 expressing firefly luciferase were seeded at  $1 \times 10^4$  cells/well into a 96-  
189 well plate and exposed to the indicated concentrations of topotecan for 96 h between days  
190 2 and 6 after plating with treatments on day 2 and 4 after plating. Bioluminescence was  
191 assessed 6 days after plating. Data are the average measurements of quadruplicate wells  
192 ±SEM.

193

194 D425 medulloblastoma cells expressing firefly luciferase were injected into the cisterna magna of  
195 mice under anesthesia. Pumps were implanted in the relevant IVT-cannulated mice immediately



196 following injection. Treatment for all groups began the day following tumor and pump implantation.  
197 Treatment groups were 1) saline IP bolus, 2) saline IVT by continuous infusion via pump, 3)  
198 topotecan IP as bolus, 4) topotecan IVT continuously via pump, or 5) topotecan IVT by daily bolus  
199 injection. The topotecan daily dose delivered into the CSF via the pump IVT was 5.28 µg/mouse  
200 in 5.28 µl/day. The bolus IVT dose was 6 µg in 6 µl administered daily by manual injection. The  
201 IP dose was 15 µg/day [29]. Controls received saline in similar volumes for each route of  
202 administration.

203  
204 Of the 35 mice in the experiment all but one developed leptomeningeal tumor, as determined by  
205 bioluminescence (Fig 2 and not shown), by symptoms related to tumor and as confirmed at  
206 necropsy. One mouse of the five in the IVT saline pump control group was still healthy appearing  
207 and gaining weight on day 46, three days after the last mouse in the whole experiment had been  
208 euthanized for tumor-related symptoms. On necropsy its brain showed no tumor, consistent with  
209 the absence of bioluminescence signal. Since all other saline control mice had extensive tumors  
210 and symptoms necessitating euthanasia between day 15-24, and even mice in the treatment  
211 groups all had obvious tumors by day 43, we concluded there was no tumor take in this mouse  
212 and excluded it from all figures and analyses.

213  
214 **Fig 2. IVT topotecan slows leptomeningeal growth of D425 medulloblastoma cells**  
215 **in nude mice.** D425-ff-luc cells were inoculated into the cisterna magna of nude mice.  
216 The following day treatment was started with topotecan via the indicated route.  
217 Bioluminescence was evaluated twice a week until mice showed clinically apparent signs  
218 of tumor on exam, at which time they were euthanized. **(A)** Bioluminescence imaging at  
219 day 14, which was the last imaging session when all mice in all groups were still alive. **(B)**  
220 Mean ± SEM of bioluminescence of each group. Means represent evaluations when all  
221 mice in the group were still alive, after which the curve is no longer shown. Below are p-  
222 values (log rank) comparing between the groups on day 14, which was the last imaging  
223 session when all mice in all groups were still alive. Saline IP, n=8 mice, Saline IVT pump,  
224 n=4, TPT IP, n=9, TPT IVT pump, n=6, TPT IVT bolus, n=7.  
225

226 Mice in the saline control groups, whether via IP bolus injection or IVT via pump, fared worse than  
227 all topotecan groups in terms of having the most rapid increase in bioluminescence (Fig 2) and  
228 shortest survival (Fig 3). Among mice receiving topotecan, both groups receiving topotecan IVT  
229 showed slower rise in total tumor burden (measured by bioluminescence) and longer symptom-  
230 free survival compared to those receiving topotecan IP (Figs 2 and 3). Median survival was similar  
231 in mice receiving topotecan IVT by daily bolus compared to continuous delivery using the pump  
232 (Fig 3). The increase in total body bioluminescence of mice in the bolus compared to continuous  
233 (pump) IVT topotecan groups showed a trend towards slower rise in bioluminescence in the bolus  
234 group (Fig 2, day 14  $p=0.0619$ , day 18  $p=0.045$ , later  $p$ -values not significant).

235

236 **Fig 3. IVT topotecan delivered by daily injection or by continuous infusion similarly**  
237 **prolong survival of mice with leptomeningeal D425 medulloblastomas, prolonging**  
238 **survival compared to IP topotecan.** Kaplan-Meier survival curves of mouse groups are  
239 shown. (A) comparison of all groups. (B) Daily IP topotecan vs. daily IP saline control. (C)  
240 Daily IP topotecan, daily IVT topotecan, or continuous IVT topotecan infusion via pump.  
241 Mice were euthanized when they showed clinical symptoms of tumor. Median survival of  
242 each group and its number of mice are noted to the right of panel (A).  $p$ -values, calculated  
243 by log rank, are shown below the survival panels.

244

245 We noticed that bioluminescence of the spines of mice receiving IVT topotecan rose faster than  
246 that of their brains, in which bioluminescence remained low (Fig 2A and not shown), suggesting  
247 that tumor in the spine was less responsive to IVT topotecan compared to the brains. This was  
248 different than mice treated with IP topotecan and the two saline groups, where tumor progression  
249 in each mouse was grossly similar in the spine and the brain. Plotting the ratio of spine to brain  
250 radiance confirmed that the increase in tumor load in brains of mice receiving topotecan IVT by  
251 either pump or bolus was indeed slower than in their spines, whereas in the other groups both  
252 rose similarly, as manifest in a steady ratio of spine-to-brain radiance (Fig 4A). Among the  
253 topotecan IVT-treated mice, radiance increase in the brain was slower in the bolus IVT group  
254 compared to the continuous infusion (pump) IVT group (Fig 4B). Spine tumor progression in mice

255 receiving topotecan IVT by bolus showed a trend towards slower tumor growth compared to those  
256 receiving it by pump but did not reach statistical significance (Fig 4C). Thus, IVT topotecan was  
257 effective against leptomeningeal medulloblastoma in the brain itself, but less so in the spinal cord.

258

259 **Fig 4. IVT topotecan preferentially slows leptomeningeal tumor growth in brains**  
260 **versus spines.** Bioluminescence of brains and spines were calculated separately for each  
261 time point. Shown are mean  $\pm$  SEM for each group, up to the date of first death in each  
262 group. **(A)** Ratios of spine-to-brain radiance measurements illustrate the relatively-faster  
263 increase in spine radiance compared to brain radiance in IVT TPT groups compared to  
264 the non-IVT groups. **(B)** Brain radiance measurements reveal more effective suppression  
265 of tumor growth in brains of TPT IP mice compared to saline IP in brains of TPT IVT (bolus  
266 or pump) mice compared to TPT IP and in brains of TPT IVT bolus mice compared to TPT  
267 IVT pump. **(C)** Spine radiance measurements reveal more effective tumor growth  
268 suppression in spines of TPT IVT bolus mice compared to TPT IP mice. There was a trend  
269 toward significance in spines of mice treated with TPT IVT bolus compared to TPT IVT  
270 pump, but it did not reach significance levels.

271

272 The hematoxylin and eosin (H&E)-stained sections of the brain and spinal column of control mice  
273 showed widespread diffuse leptomeningeal involvement of the cerebrum, cerebellum and spinal  
274 cord (Fig 5). There was extension of tumor cells focally into the Virchow Robin spaces of the brain  
275 and perineural involvement of cranial nerves and spinal nerve roots as well as surrounding dorsal  
276 root ganglia. The neoplastic cells were moderately pleomorphic and were characterized by  
277 markedly enlarged nuclei with prominent eosinophilic nucleoli and scant to moderate amounts of  
278 eosinophilic cytoplasm. The mitotic rate was brisk and there were frequent karyorrhectic cells.

279

280 **Fig 5: Leptomeningeal spread of D425 medulloblastoma cells is extensive.** H&E  
281 stain of cerebellum **(A; sagittal section)** and spine **(B-D; cross-sections)** from a control  
282 mouse (IVT saline pump) euthanized at the time of tumor symptoms. Sections show  
283 extensive leptomeningeal spread of tumor cells around the brain and the spinal cord.

284

285 Consistent with the bioluminescence imaging, brains of mice receiving topotecan IVT showed  
286 very little tumor on H&E, although they had abundant tumor surrounding their spinal cords (Fig 4

287 and not shown). Mice receiving IVT topotecan showed varying degrees of inflammation and  
288 ventriculitis (Table 1).

289  
290

291 **TABLE 1: Brains of mice receiving IVT topotecan show inflammation and brain**  
292 **necrosis.**  
293

|                 | # of mice/<br>group | Necrosis                  | Inflammation |
|-----------------|---------------------|---------------------------|--------------|
| Saline IVT pump | 4                   | 0 / 4                     | 0 / 4        |
| Saline IP bolus | 8                   | 0 / 8                     | 0 / 8        |
| TPT IP bolus    | 9                   | 0 / 9                     | 0 / 9        |
| TPT IVT bolus   | 7                   | <b>4 / 4</b> <sup>a</sup> | <b>5 / 7</b> |
| TPT IVT pump    | 6                   | <b>6 / 6</b>              | <b>6 / 6</b> |

294  
295 Summary of findings in the harvested mouse brains, as evaluated by H&E staining of 2-4  
296 FFPE sections from each brain: Numbers in the denominator reflect the number of brains  
297 from the group that were assessible for necrosis or inflammation. The numerator reflects  
298 the number of brains in which necrosis or inflammation was found. Evaluation was by two  
299 independent blinded observers.

300 <sup>a</sup> Brain necrosis and inflammation were only seen in brains with IVT topotecan (**bold font**).  
301 Where necrosis was present, it was in the general region shown in Fig 6. Inflammation  
302 and tumor were not specific to this region. In three of the brains of the IVT bolus TPT  
303 group, the brains were torn during harvesting such that they were missing the region where  
304 necrosis was seen in other IVT TPT mice. It is possible that this tissue loss occurred during  
305 removal of the cannulas when preparing the brains for fixation. Therefore, the denominator  
306 for evaluation of necrosis in the group of mice receiving IVT topotecan bolus was only 4  
307 of the 7 brains.  
308

309 Mice receiving topotecan, regardless of route, did not demonstrate overt clinical systemic toxicity,  
310 as reflected in their normal behavior, typical feeding and comparable weight gain during the bulk  
311 of the experiment. Symptoms requiring euthanasia were those usually attributed to brain tumor-  
312 associated symptoms (weight loss, lack of grooming, hunched posture) but not symptoms one  
313 would anticipate with symptomatic spinal cord metastases such as paralysis or limb weakness.  
314 IVT topotecan mice had at least 1 log lower brain bioluminescence and less intracranial tumor in  
315 their brain sections compared to non-IVT topotecan mice (Fig 4B and not shown). It was therefore  
316 surprising that despite the lower tumor load within their brains (Fig 4B), these IVT topotecan mice

317 showed only mild survival advantage (Fig 3A) and their euthanasia was prompted by brain-related  
318 symptoms. Histologic examination of brains of these IVT topotecan mice showed areas of brain  
319 necrosis in the cortical region above the hippocampus (Fig 6). No necrosis was seen in other  
320 brain regions nor in any of the control mice, including mice who received IVT saline via osmotic  
321 pump and those who received topotecan intraperitoneally. This indicated that the necrosis was  
322 not related to the presence of the cannula *per se* but, rather, to treatment with IVT topotecan. We  
323 cannot exclude that cannula termination position may have also played a role. Necrosis was more  
324 extensive and severe in mice treated IVT using the osmotic pumps compared to the IVT bolus-  
325 treated mice.

326

327 **Fig 6. IVT topotecan delivered via intracranial cannula causes brain necrosis in a**  
328 **cortical region superior to the hippocampus.** Representative H&E stained sections of  
329 brains from mice that received either IVT saline (top) or IVT topotecan (bottom) by  
330 continuous infusion pump. Brains of the other assessable mice that received IVT topotecan  
331 by bolus or by pump, but not of mice that received saline or IP topotecan, also showed  
332 necrosis in the region superior to the hippocampus. Magnifications are 40X (left) and 200X  
333 (right).  
334

335 In summary, topotecan delivered into the cerebrospinal fluid prolonged symptom-free survival of  
336 mice in a leptomeningeal model of a Group 3 medulloblastoma using D425 Med cells compared  
337 to saline controls and to IP delivery of topotecan. Both IVT topotecan groups showed better tumor  
338 control within their brains compared to their spines with a trend toward better tumor control in  
339 brains of the bolus compared to the pump IVT topotecan mice. Under these conditions daily bolus  
340 IVT topotecan provided survival benefit that was similar to continuous IVT delivery and both were  
341 associated with varying degree of localized brain necrosis. The survival benefit of IVT topotecan  
342 may have been greater if the presumed locally-toxic effect of the topotecan could be averted.

343

344

345

## 346 Discussion

347 The cultured medulloblastoma cell lines were variably sensitive to topotecan, a topoisomerase I  
348 inhibitor (Fig 1), similar to what others have reported [29-32]). Topotecan has clinical activity  
349 against childhood medulloblastoma in humans at concentrations above 1 ng/mL in CSF and  
350 exposure of over 8 h per day [29, 33]. Clinical trials have tested intrathecal bolus dosing of  
351 topotecan to determine its optimal dose, revealing limitations related to suboptimal drug level or  
352 toxicity at peak doses when using bolus dosing [7, 8, 34-36]. Continuous infusion of topotecan  
353 into the CSF is tolerable [11], but it is not yet known whether this method is more effective than  
354 bolus dosing. Here we report that in mice, topotecan showed only limited activity against  
355 leptomeningeal D425 Group 3 human medulloblastoma cells when delivered intraperitoneally.  
356 Topotecan produced a greater survival benefit when delivered directly into the CSF, either as  
357 continuous infusion using an osmotic pump or by bolus injection.

358  
359 A prior study showed activity of IP topotecan against D425 subcutaneous xenografts when it was  
360 used at 1.9 mg/kg/day (47.5  $\mu$ g per day for a 25 g mouse) 5 days/week x 2 weeks, a dose that  
361 was lethal to 10% of the mice [31]. We therefore based our dosing on a study to determine optimal  
362 curative dosing in a xenograft model of human ovarian cancer in nude mice, that produced no  
363 toxic deaths (0.625 mg/kg/day (15.6  $\mu$ g per day for a 25 g mouse) 5 days/week x 4 weeks) [37].  
364 In our study, IP topotecan daily at 15  $\mu$ g per mouse per day slowed tumor growth (i.e., slowed the  
365 increase in bioluminescence) and prolonged median survival of mice carrying leptomeningeal  
366 D425 without overt clinical toxicity. The human equivalent dose is 1.27 mg/m<sup>2</sup>/day. This mouse  
367 dosing is in line with considerations extrapolated from pediatric topotecan dosing where a  
368 topotecan regimen of 1.2 mg/m<sup>2</sup>/day x 5 days systemically was well tolerated in children with  
369 neuroblastoma [38] and within the range considered tolerable and effective as studied in adults  
370 with ovarian cancer and small cell lung cancer [39, 40]. While IP topotecan prolonged median

371 survival of our mice by 35% compared to IP saline (25 days vs. 18.5 days, respectively,  $p=0.0175$ ;  
372 Fig 3), this approach did not achieve cures.

373

374 To achieve higher CSF topotecan and avoid systemic toxicity we tested direct intraventricular  
375 delivery into the cerebrospinal fluid by daily bolus and by continuous infusion. Dosing was based  
376 on published experience in pediatric patients and on our topotecan sensitivity experiments in  
377 D425 Med. In children, the maximal tolerated dose of bolus intrathecal topotecan is 0.4 mg/dose  
378 x 2 per week for 4 weeks [34]. A relatively well tolerated daily intrathecal bolus topotecan dose in  
379 children is 0.2 mg/day x 5 days [8]. Continuous infusion topotecan at that dose (0.2 mg/day x 7  
380 days) was also well tolerated without signs of ventriculitis [11]. A 6-month-old Japanese infant  
381 was reported to receive 0.3 mg x 2 per week for 4 weeks followed by 0.4 mg x 1 per week for 1  
382 month and then 0.4 mg less frequently for 12 additional months without severe arachnoiditis other  
383 than fever [28]. After calculating the volume of CSF in this 6-month-old infant to be approximately  
384 16 ml, given an estimated weight of 8 kg [42] and a CSF volume of 2 ml per kg body weight [43],  
385 a 0.4 mg dose of topotecan in this patient would translate to a topotecan concentration in CSF of  
386 25  $\mu\text{g/ml}$ , which is somewhat higher than the concentration required to kill D425 cells in our cell  
387 culture experiments (1-10  $\mu\text{g/ml}$ ). In our continuously pumped IVT topotecan mice, we gave a  
388 5.28  $\mu\text{g}$  dose over a 24 h period, or 0.22  $\mu\text{g/h}$ . Thus the maximum concentration of topotecan in  
389 the CSF (35  $\mu\text{l}$  volume [41]) of pumped IVT mice after an hour of infusion might be calculated to  
390 be 6.29  $\mu\text{g/ml}$  (0.22  $\mu\text{g}$  / 35  $\mu\text{l}$ ), although the steady-state concentration will be lower due to CSF  
391 production and turnover (18  $\mu\text{l/h}$  [41]). The similar daily dose of topotecan IVT (6  $\mu\text{g}$ ) delivered as  
392 bolus is expected to generate a short period with a very high concentration of drug in the CSF of  
393 mice in the bolus IVT group (171  $\mu\text{g/ml}$ ). The differences in maximum achieved drug  
394 concentrations between the two IVT topotecan groups may account in part for the better tumor  
395 control in the brains (Fig 4B) and the trend towards improved control in the spines (Fig 4C) of the  
396 bolus IVT topotecan mice compared to the pumped IVT group.



397

398 Since the pumped IVT dose (5.28  $\mu\text{g}/\text{day}$ ) would deliver higher drug amount to the CSF compared  
399 to the systemic (IP) topotecan (15  $\mu\text{g}/\text{day}$ ), it is not known if the higher efficacy of IVT topotecan  
400 was due to the route of drug delivery or the higher targeted dose of the IVT delivery. Since survival  
401 was similar in the IP saline control group and the IVT pump saline control group, this suggests  
402 that absence or presence of IVT catheter did not by itself affect survival. A minor limitation of the  
403 study is that the pumps, designed to reliably deliver drug for at least 28 days, were not replaced  
404 with new pumps after that time, since by then half the mice had to be euthanized due to tumor.  
405 As a result, it is formally possible that the three remaining mice in the pump group (euthanized on  
406 days 32, 41 and 43) had less drug delivered toward the end of the experiment.

407

408 We found that tumor was well suppressed within the brains of both the bolus and pump topotecan  
409 IVT groups, compared to the other groups, but less so in the spines. The IVT bolus delivery  
410 showed better control of the brain radiance and a trend toward better control of the spine radiance  
411 compared to continuous infusion of topotecan into the CSF. As mentioned above, a slightly higher  
412 daily dose of topotecan in the bolus group versus the pump group may have played a role in this,  
413 as could the higher peak dose of topotecan in the bolus group. The trend to lower control of the  
414 spine radiance in the continuous IVT topotecan group is also consistent with the thought that slow  
415 continuous drug infusion into the CSF may not achieve optimal CSF distribution due to the slow  
416 complex CSF flow through the heterogeneous CSF space [44, 45]. It suggests that a better  
417 distribution of drug to the spine may occur with the bolus injections. It is thus possible that a  
418 pulsatile and frequent intermittent flow that creates greater infusional forces may be more effective  
419 in increasing CSF mixing and optimizing drug distribution to the spine [44, 45] while also  
420 maintaining improved drug exposure over time. This confirms that topotecan can slow D425 Med  
421 xenograft growth in the brains of this leptomeningeal model using either continuous or bolus IVT



422 modes of delivery, but that similar control of tumor growth in the spines will presumably require  
423 more effective delivery to this area.

424  
425 The median survival times of the bolus and continuous IVT topotecan groups were similar, and  
426 both were significantly longer than the saline groups or the IP topotecan group. Since tumor  
427 burden within the brains of the IVT topotecan mice was much lower than in the other groups (Fig  
428 2A, 4B) and we found localized necrosis in similar brain regions in both IVT topotecan groups (Fig  
429 6, Table 1), we suspect that direct topotecan toxicity (e.g., brain necrosis) may have contributed  
430 to the demise of these mice. Despite the localized area of necrosis in the brain parenchyma,  
431 adjoining areas, including the ventricular lining, were unaffected. Relevant to this, convection  
432 enhanced delivery of topotecan into pig brain was reported to induce parenchymal damage in the  
433 brains as evidenced by magnetic resonance spectroscopy, with their histology showing necrosis  
434 along the catheter track [46]. The localized brain necrosis in our mice was only seen in those  
435 treated with IVT topotecan (i.e., those with both cannulas and topotecan) and was found in similar  
436 brain regions in them. While this suggests possible seeping of drug around the cannula as  
437 hypothesized in the pig brains above [46], we cannot rule out that cannulas which inadvertently  
438 terminated within the brain parenchyma may have contributed to the toxicity in some of the IVT  
439 topotecan mice.

440  
441 In summary, we showed that prolonged delivery of topotecan directly into intraventricular CSF of  
442 mice with leptomeningeal D425 medulloblastoma effectively slows leptomeningeal tumor growth  
443 within the brain, is less effective in the spine, confers survival advantage on the mice, but is  
444 insufficient to cure them. The trend towards better control of the spine tumors in the bolus  
445 compared to the continuous IVT topotecan group suggests that pulsatile intermittent dosing into  
446 the CSF may improve drug distribution and anti-tumor effect.

## 447 **Acknowledgements**

448 This work was supported by grant NS088965 from the NIH, National Institute of Neurological  
449 Disorders and Stroke and in part by the USC Coulter Translational Research Partnership  
450 Program. It was also supported in part by support from the Barbara Mandel Family Fund, the  
451 Brad Kaminsky Foundation Heroes of Hope Race, Grayson's Gift and the Rachel Ann Hage  
452 Foundation.

453

454

## 455 **References**

- 456 1. Dhall G. Medulloblastoma. *J Child Neurol.* 2009;24(11):1418-30. Epub 2009/10/21. doi:  
457 10.1177/0883073809341668. PubMed PMID: 19841429.
- 458 2. Rutkowski S, von Hoff K, Emser A, Zwiener I, Pietsch T, Figarella-Branger D, et al. Survival  
459 and prognostic factors of early childhood medulloblastoma: an international meta-analysis. *J*  
460 *Clin Oncol.* 2010;28(33):4961-8. Epub 2010/10/14. doi: 10.1200/JCO.2010.30.2299.  
461 PubMed PMID: 20940197.
- 462 3. Fouladi M, Gajjar A, Boyett JM, Walter AW, Thompson SJ, Merchant TE, et al. Comparison  
463 of CSF cytology and spinal magnetic resonance imaging in the detection of leptomeningeal  
464 disease in pediatric medulloblastoma or primitive neuroectodermal tumor. *J Clin Oncol.*  
465 1999;17(10):3234-7. Epub 1999/10/03. PubMed PMID: 10506624.
- 466 4. Northcott PA, Korshunov A, Witt H, Hielscher T, Eberhart CG, Mack S, et al.  
467 Medulloblastoma comprises four distinct molecular variants. *J Clin Oncol.* 2011;29(11):1408-  
468 14. Epub 2010/09/09. doi: 10.1200/JCO.2009.27.4324. PubMed PMID: 20823417; PubMed  
469 Central PMCID: PMC4874239.
- 470 5. Jain N, Krull KR, Brouwers P, Chintagumpala MM, Woo SY. Neuropsychological outcome  
471 following intensity-modulated radiation therapy for pediatric medulloblastoma. *Pediatr Blood*  
472 *Cancer.* 2008;51(2):275-9. Epub 2008/04/19. doi: 10.1002/pbc.21580. PubMed PMID:  
473 18421716.
- 474 6. Mulhern RK, Palmer SL, Merchant TE, Wallace D, Kocak M, Brouwers P, et al.  
475 Neurocognitive consequences of risk-adapted therapy for childhood medulloblastoma. *J Clin*

- 476 Oncol. 2005;23(24):5511-9. Epub 2005/08/20. doi: 10.1200/JCO.2005.00.703. PubMed  
477 PMID: 16110011.
- 478 7. Beauchesne P. Intrathecal chemotherapy for treatment of leptomeningeal dissemination of  
479 metastatic tumours. *Lancet Oncol.* 2010;11(9):871-9. Epub 2010/07/06. doi: 10.1016/S1470-  
480 2045(10)70034-6. PubMed PMID: 20598636.
- 481 8. Blaney SM, Tagen M, Onar-Thomas A, Berg SL, Gururangan S, Scorsone K, et al. A phase-  
482 1 pharmacokinetic optimal dosing study of intraventricular topotecan for children with  
483 neoplastic meningitis: a Pediatric Brain Tumor Consortium study. *Pediatr Blood Cancer.*  
484 2013;60(4):627-32. Epub 2012/09/25. doi: 10.1002/pbc.24309. PubMed PMID: 23002039;  
485 PubMed Central PMCID: PMC3573253.
- 486 9. Rudick RA, Zirretta DK, Herndon RM. Clearance of albumin from mouse subarachnoid  
487 space: a measure of CSF bulk flow. *J Neurosci Methods.* 1982;6(3):253-9. Epub  
488 1982/09/01. PubMed PMID: 7144238.
- 489 10. Johanson CE, Duncan JA, 3rd, Klinge PM, Brinker T, Stopa EG, Silverberg GD. Multiplicity  
490 of cerebrospinal fluid functions: New challenges in health and disease. *Cerebrospinal Fluid*  
491 *Res.* 2008;5:10. Epub 2008/05/16. doi: 10.1186/1743-8454-5-10. PubMed PMID: 18479516;  
492 PubMed Central PMCID: PMC2412840.
- 493 11. Tran HC, Gardner S, Weiner HL, Liebes LF, Finlay JL. Pilot study assessing a seven-day  
494 continuous intrathecal topotecan infusion for recurrent or progressive leptomeningeal  
495 metastatic cancer. *J Oncol Pharm Pract.* 2013. Epub 2013/08/10. doi:  
496 10.1177/1078155213494940. PubMed PMID: 23929729.
- 497 12. He XM, Wikstrand CJ, Friedman HS, Bigner SH, Pleasure S, Trojanowski JQ, et al.  
498 Differentiation characteristics of newly established medulloblastoma cell lines (D384 Med,  
499 D425 Med, and D458 Med) and their transplantable xenografts. *Lab Invest.* 1991;64(6):833-  
500 43. Epub 1991/06/01. PubMed PMID: 1904513.
- 501 13. Carbonaro DA, Jin X, Petersen D, Wang X, Dorey F, Kil KS, et al. In vivo transduction by  
502 intravenous injection of a lentiviral vector expressing human ADA into neonatal ADA gene  
503 knockout mice: a novel form of enzyme replacement therapy for ADA deficiency. *Mol Ther.*  
504 2006;13(6):1110-20. Epub 2006/05/03. doi: 10.1016/j.ymthe.2006.02.013. PubMed PMID:  
505 16651028.
- 506 14. Kobayashi H, Carbonaro D, Pepper K, Petersen D, Ge S, Jackson H, et al. Neonatal gene  
507 therapy of MPS I mice by intravenous injection of a lentiviral vector. *Mol Ther.*  
508 2005;11(5):776-89. Epub 2005/04/27. doi: 10.1016/j.ymthe.2004.10.006. PubMed PMID:  
509 15851016.

- 510 15. Stastny MJ, Brown CE, Ruel C, Jensen MC. Medulloblastomas expressing IL13Alpha2 are  
511 targets for IL13-zetakine+ cytolytic T cells. *J Pediatr Hematol Oncol.* 2007;29(10):669-77.  
512 Epub 2007/10/09. doi: 10.1097/MPH.0b013e3181468c68  
513 00043426-200710000-00001 [pii]. PubMed PMID: 17921847.
- 514 16. Ivanov DP, Coyle B, Walker DA, Grabowska AM. In vitro models of medulloblastoma:  
515 Choosing the right tool for the job. *J Biotechnol.* 2016;236:10-25. doi:  
516 10.1016/j.jbiotec.2016.07.028. PubMed PMID: 27498314.
- 517 17. Xu J, Margol A, Asgharzadeh S, Erdreich-Epstein A. Pediatric brain tumor cell lines. *J Cell*  
518 *Biochem.* 2015;116(2):218-24. doi: 10.1002/jcb.24976. PubMed PMID: 25211508.
- 519 18. Bunt J, Hasselt NE, Zwijnenburg DA, Hamdi M, Koster J, Versteeg R, et al. OTX2 directly  
520 activates cell cycle genes and inhibits differentiation in medulloblastoma cells. *Int J Cancer.*  
521 2012;131(2):E21-32. Epub 2011/10/04. doi: 10.1002/ijc.26474. PubMed PMID: 21964830.
- 522 19. Ramaswamy V, Taylor MD. Medulloblastoma: from myth to molecular. *J Clin Oncol.*  
523 2017;35(21):2355-63. doi: 10.1200/JCO.2017.72.7842. PubMed PMID: 28640708.
- 524 20. Taylor MD, Northcott PA, Korshunov A, Remke M, Cho YJ, Clifford SC, et al. Molecular  
525 subgroups of medulloblastoma: the current consensus. *Acta Neuropathol.* 2012;123(4):465-  
526 72. Epub 2011/12/03. doi: 10.1007/s00401-011-0922-z. PubMed PMID: 22134537; PubMed  
527 Central PMCID: PMC3306779.
- 528 21. Shackelford GM, Shi XH, Swanson KS, Mahdi MY, Gonzalez-Gomez I, Asgharzadeh S, et  
529 al. BarTeL, a genetically versatile, bioluminescent and granule neuron precursor-targeted  
530 mouse model for medulloblastoma. *PLoS One.* 2016;11(6):e0156907. doi:  
531 10.1371/journal.pone.0156907. PubMed PMID: 27310018; PubMed Central PMCID:  
532 PMCPMC4911170.
- 533 22. Taylor MD, Northcott PA, Korshunov A, Remke M, Cho YJ, Clifford SC, et al. Molecular  
534 subgroups of medulloblastoma: the current consensus. *Acta Neuropathol.* 2012;123(4):465-  
535 72. Epub 2011/12/03. doi: 10.1007/s00401-011-0922-z. PubMed PMID: 22134537; PubMed  
536 Central PMCID: PMC3306779.
- 537 23. Pompe RS, von Bueren AO, Mynarek M, von Hoff K, Friedrich C, Kwicien R, et al.  
538 Intraventricular methotrexate as part of primary therapy for children with infant and/or  
539 metastatic medulloblastoma: Feasibility, acute toxicity and evidence for efficacy. *Eur J*  
540 *Cancer.* 2015;51(17):2634-42. Epub 2015/09/09. doi: 10.1016/j.ejca.2015.08.009. PubMed  
541 PMID: 26346136.
- 542 24. von Bueren AO, von Hoff K, Pietsch T, Gerber NU, Warmuth-Metz M, Deinlein F, et al.  
543 Treatment of young children with localized medulloblastoma by chemotherapy alone: results

- 544 of the prospective, multicenter trial HIT 2000 confirming the prognostic impact of histology.  
545 Neuro Oncol. 2011;13(6):669-79. Epub 2011/06/04. doi: 10.1093/neuonc/nor025. PubMed  
546 PMID: 21636711; PubMed Central PMCID: PMC3107096.
- 547 25. Rutkowski S, Bode U, Deinlein F, Ottensmeier H, Warmuth-Metz M, Soerensen N, et al.  
548 Treatment of early childhood medulloblastoma by postoperative chemotherapy alone. N  
549 Engl J Med. 2005;352(10):978-86. Epub 2005/03/11. doi: 10.1056/NEJMoa042176. PubMed  
550 PMID: 15758008.
- 551 26. Gaviani P, Corsini E, Salmaggi A, Lamperti E, Botturi A, Erbetta A, et al. Liposomal  
552 cytarabine in neoplastic meningitis from primary brain tumors: a single institutional  
553 experience. Neurol Sci. 2013;34(12):2151-7. Epub 2013/03/26. doi: 10.1007/s10072-013-  
554 1358-0. PubMed PMID: 23525755.
- 555 27. Benesch M, Sovinz P, Krammer B, Lackner H, Mann G, Schwinger W, et al. Feasibility and  
556 toxicity of intrathecal liposomal cytarabine in 5 children and young adults with refractory  
557 neoplastic meningitis. J Pediatr Hematol Oncol. 2007;29(4):222-6. Epub 2007/04/07. doi:  
558 10.1097/MPH.0b013e318041f112. PubMed PMID: 17414563.
- 559 28. Yamada A, Moritake H, Kamimura S, Yamashita S, Takeshima H, Nuno H. Proposed  
560 strategy for the use of high-dose chemotherapy with stem cell rescue and intrathecal  
561 topotecan without whole-brain irradiation for infantile classic medulloblastoma. Pediatr Blood  
562 Cancer. 2014;61(12):2316-8. Epub 2014/09/02. doi: 10.1002/pbc.25174. PubMed PMID:  
563 25174961.
- 564 29. Pawlik CA, Houghton PJ, Stewart CF, Cheshire PJ, Richmond LB, Danks MK. Effective  
565 schedules of exposure of medulloblastoma and rhabdomyosarcoma xenografts to topotecan  
566 correlate with in vitro assays. Clin Cancer Res. 1998;4(8):1995-2002. Epub 1998/08/26.  
567 PubMed PMID: 9717830.
- 568 30. Danks MK, Pawlik CA, Whipple DO, Wolverson JS. Intermittent exposure of  
569 medulloblastoma cells to topotecan produces growth inhibition equivalent to continuous  
570 exposure. Clin Cancer Res. 1997;3(10):1731-8. Epub 1998/11/17. PubMed PMID: 9815557.
- 571 31. Friedman HS, Houghton PJ, Schold SC, Keir S, Bigner DD. Activity of 9-  
572 dimethylaminomethyl-10-hydroxycamptothecin against pediatric and adult central nervous  
573 system tumor xenografts. Cancer Chemother Pharmacol. 1994;34(2):171-4. Epub  
574 1994/01/01. PubMed PMID: 8194169.
- 575 32. Janss AJ, Cnaan A, Zhao H, Shpilsky A, Levow C, Sutton L, et al. Synergistic cytotoxicity of  
576 topoisomerase I inhibitors with alkylating agents and etoposide in human brain tumor cell  
577 lines. Anticancer Drugs. 1998;9(7):641-52. Epub 1998/10/17. PubMed PMID: 9773809.

- 578 33. Sasine JP, Savaraj N, Feun LG. Topoisomerase I inhibitors in the treatment of primary CNS  
579 malignancies: an update on recent trends. *Anticancer Agents Med Chem.* 2010;10(9):683-  
580 96. Epub 2011/01/18. PubMed PMID: 21235438.
- 581 34. Blaney SM, Heideman R, Berg S, Adamson P, Gillespie A, Geyer JR, et al. Phase I clinical  
582 trial of intrathecal topotecan in patients with neoplastic meningitis. *J Clin Oncol.*  
583 2003;21(1):143-7. Epub 2002/12/31. PubMed PMID: 12506183.
- 584 35. Glaberman U, Rabinowitz I, Verschraegen CF. Alternative administration of camptothecin  
585 analogues. *Expert Opin Drug Deliv.* 2005;2(2):323-33. Epub 2005/11/22. doi:  
586 10.1517/17425247.2.2.323. PubMed PMID: 16296757.
- 587 36. Potter SL, Berg S, Ingle AM, Krailo M, Adamson PC, Blaney SM. Phase 2 clinical trial of  
588 intrathecal topotecan in children with refractory leptomeningeal leukemia: a Children's  
589 Oncology Group trial (P9962). *Pediatr Blood Cancer.* 2012;58(3):362-5. Epub 2011/09/13.  
590 doi: 10.1002/pbc.23317. PubMed PMID: 21910214; PubMed Central PMCID: PMC3242923.
- 591 37. Guichard S, Montazeri A, Chatelut E, Hennebelle I, Bugat R, Canal P. Schedule-dependent  
592 activity of topotecan in OVCAR-3 ovarian carcinoma xenograft: pharmacokinetic and  
593 pharmacodynamic evaluation. *Clin Cancer Res.* 2001;7(10):3222-8. Epub 2001/10/12.  
594 PubMed PMID: 11595718.
- 595 38. Park JR, Scott JR, Stewart CF, London WB, Naranjo A, Santana VM, et al. Pilot induction  
596 regimen incorporating pharmacokinetically guided topotecan for treatment of newly  
597 diagnosed high-risk neuroblastoma: a Children's Oncology Group study. *J Clin Oncol.*  
598 2011;29(33):4351-7. Epub 2011/10/20. doi: 10.1200/JCO.2010.34.3293. PubMed PMID:  
599 22010014; PubMed Central PMCID: PMC3221519.
- 600 39. Armstrong DK, Spriggs D, Levin J, Poulin R, Lane S. Hematologic safety and tolerability of  
601 topotecan in recurrent ovarian cancer and small cell lung cancer: an integrated analysis.  
602 *Oncologist.* 2005;10(9):686-94. Epub 2005/10/27. doi: 10.1634/theoncologist.10-9-686.  
603 PubMed PMID: 16249347.
- 604 40. Armstrong DK. Topotecan dosing guidelines in ovarian cancer: reduction and management  
605 of hematologic toxicity. *Oncologist.* 2004;9(1):33-42. Epub 2004/02/03. PubMed PMID:  
606 14755013.
- 607 41. Pardridge W. Transnasal and intraventricular delivery of drugs. In: Pardridge W, editor.  
608 *Peptide Drug Delivery to the Brain.* New York: Raven Press; 1991. p. 99–122.
- 609 42. Kato N, Takimoto H, Yokoyama T, Yokoya S, Tanaka T, Tada H. Updated Japanese growth  
610 references for infants and preschool children, based on historical, ethnic and environmental

- 611 characteristics. *Acta Paediatrica* (Oslo, Norway : 1992). 2014;103(6):e251-e61. doi:  
612 10.1111/apa.12587. PubMed PMID: PMC4114539.
- 613 43. Rochette A, Malenfant Rancourt MP, Sola C, Prodhomme O, Saguintaah M, Schaub R, et  
614 al. Cerebrospinal fluid volume in neonates undergoing spinal anaesthesia: a descriptive  
615 magnetic resonance imaging study. *Br J Anaesth*. 2016;117(2):214-9. Epub 2016/07/22. doi:  
616 10.1093/bja/aew185. PubMed PMID: 27440633.
- 617 44. Bulat M, Klarica M. Recent insights into a new hydrodynamics of the cerebrospinal fluid.  
618 *Brain Res Rev*. 2011;65(2):99-112. Epub 2010/09/08. doi:  
619 10.1016/j.brainresrev.2010.08.002. PubMed PMID: 20817024.
- 620 45. Chikly B, Quaghebeur J. Reassessing cerebrospinal fluid (CSF) hydrodynamics: a literature  
621 review presenting a novel hypothesis for CSF physiology. *J Bodyw Mov Ther*.  
622 2013;17(3):344-54. Epub 2013/06/19. doi: 10.1016/j.jbmt.2013.02.002. PubMed PMID:  
623 23768280.
- 624 46. Sonabend AM, Stuart RM, Yun J, Yanagihara T, Mohajed H, Dashnaw S, et al. Prolonged  
625 intracerebral convection-enhanced delivery of topotecan with a subcutaneously implantable  
626 infusion pump. *Neuro Oncol*. 2011;13(8):886-93. Epub 2011/07/14. doi:  
627 10.1093/neuonc/nor051. PubMed PMID: 21750007; PubMed Central PMCID: PMC3145467.  
628



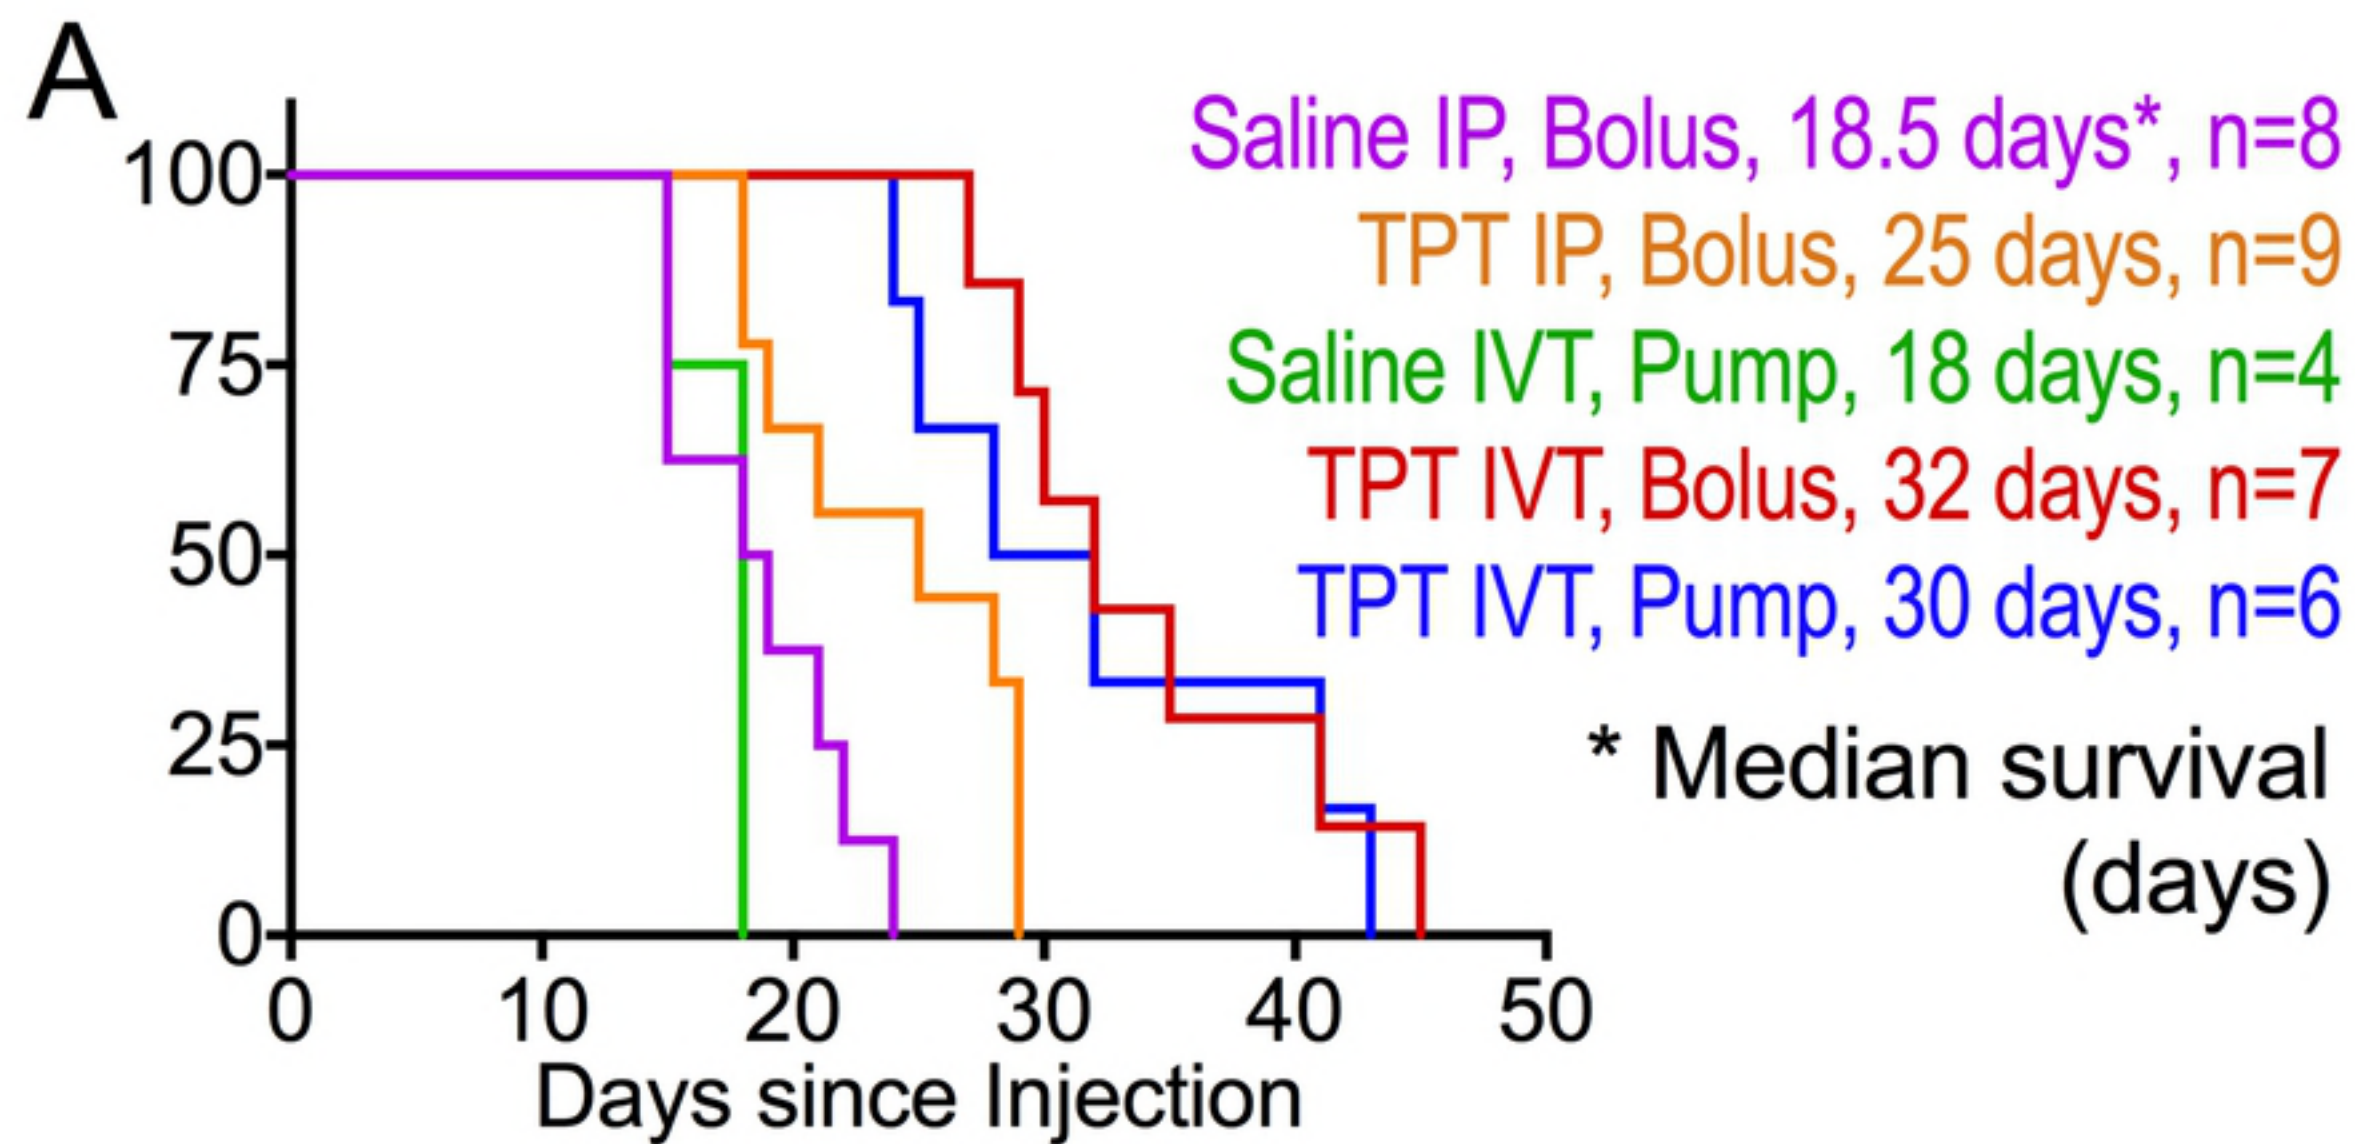

bioRxiv preprint doi: <https://doi.org/10.1101/443994>; this version posted October 15, 2018. The copyright holder for this preprint (which was not certified by peer review) is the author/funder, who has granted bioRxiv a license to display the preprint in perpetuity. It is made available under aCC-BY 4.0 International license.

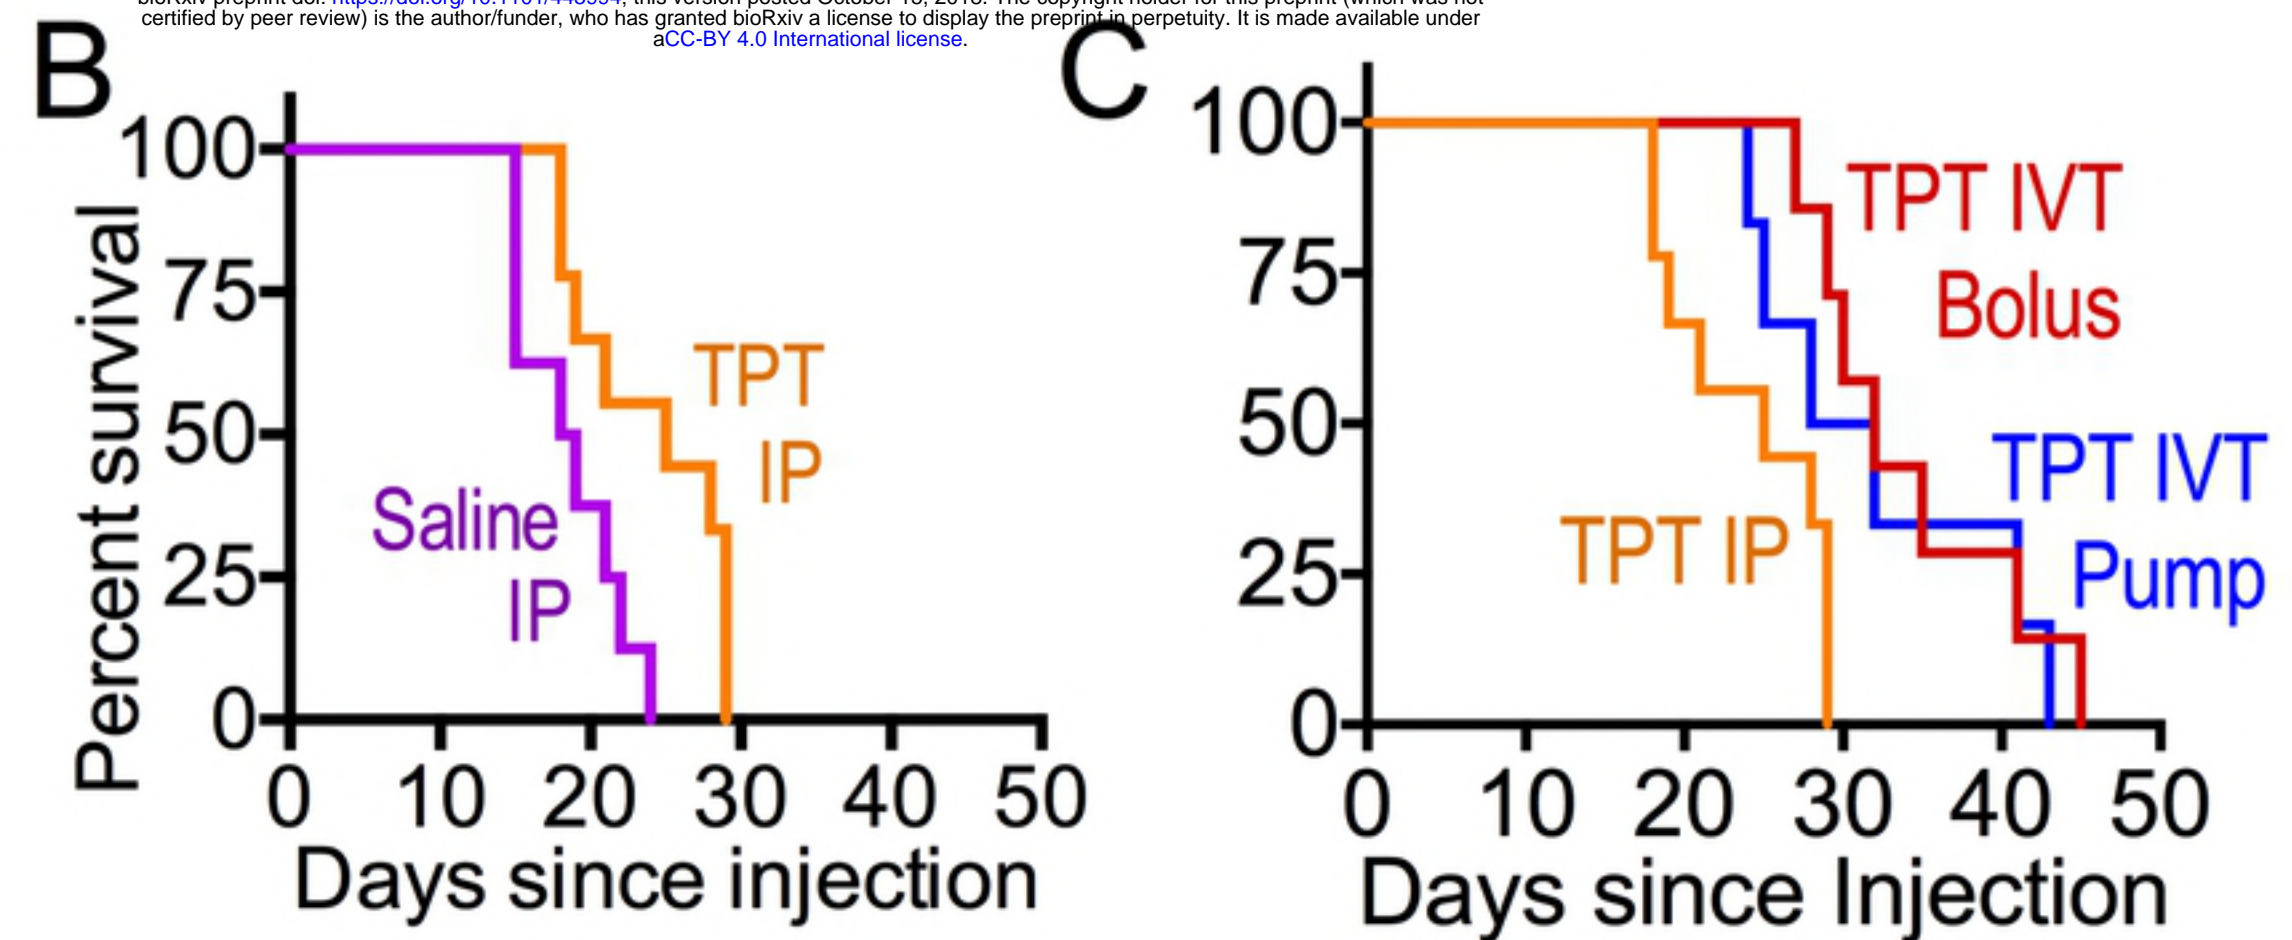

Saline IP vs. TPT IP:  $p=0.018$   
 Saline IP vs. TPT IVT, Bolus:  $p<0.0001$   
 Saline IP vs. TPT IVT, Pump:  $p=0.0005$   
 TPT IP vs. All TPT IVT (bolus+pump):  $p=0.003$   
 TPT IP vs. TPT IVT, Bolus:  $p=0.003$   
 TPT IP vs. TPT IVT, Pump:  $p=0.077$   
 TPT IVT, Bolus vs. TPT IVT, Pump:  $p=0.58$

Figure 3



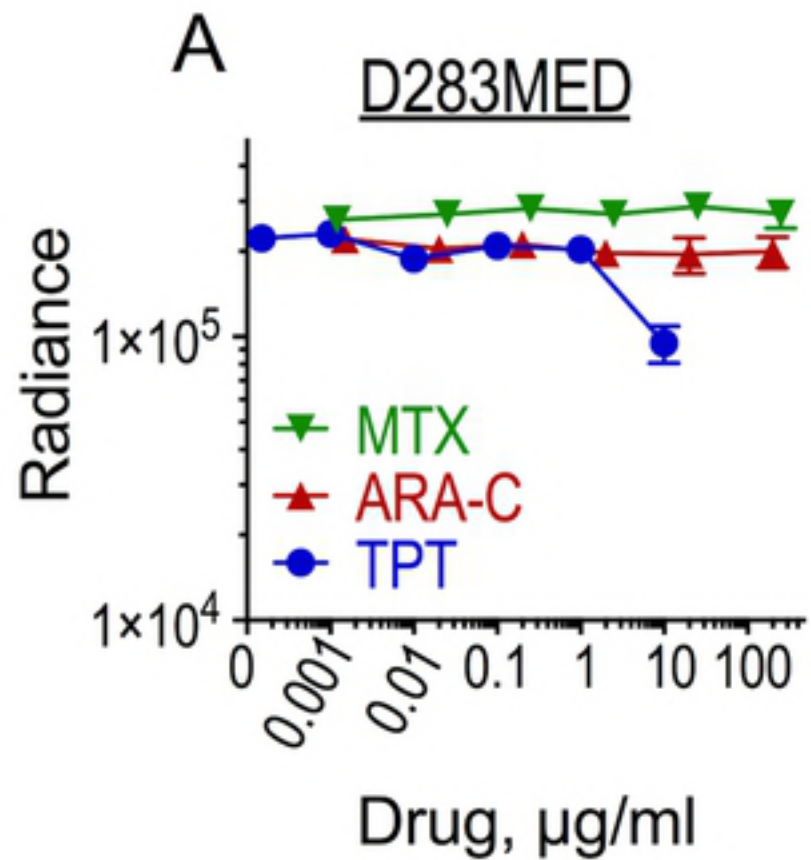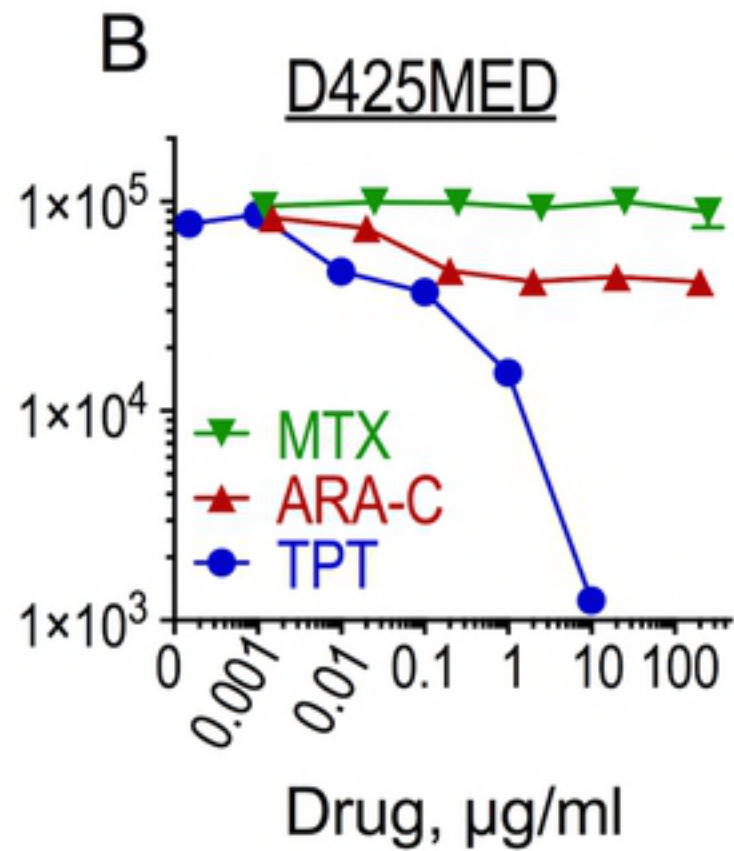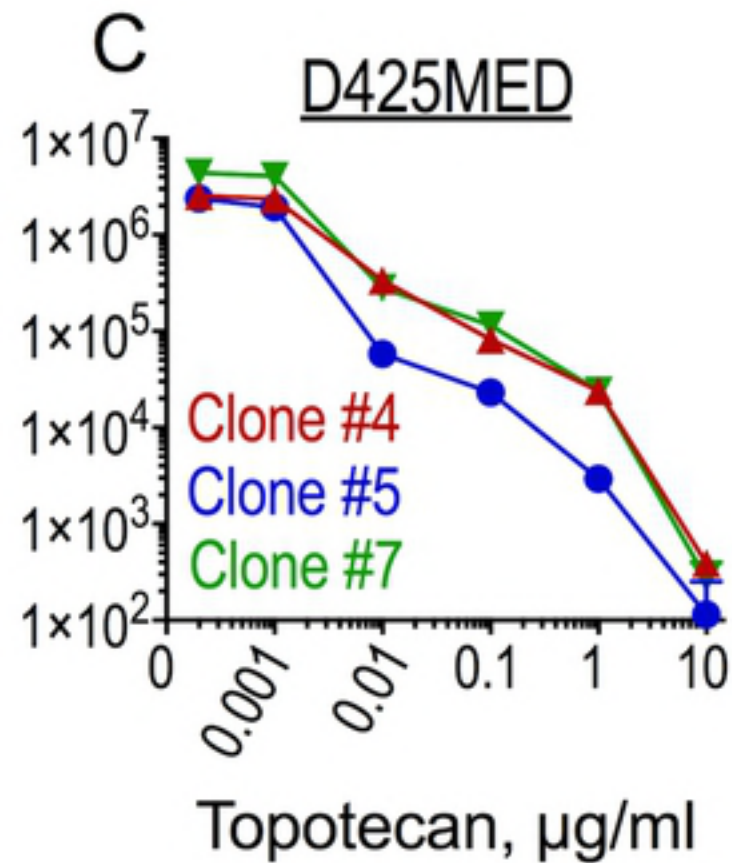

Figure 1

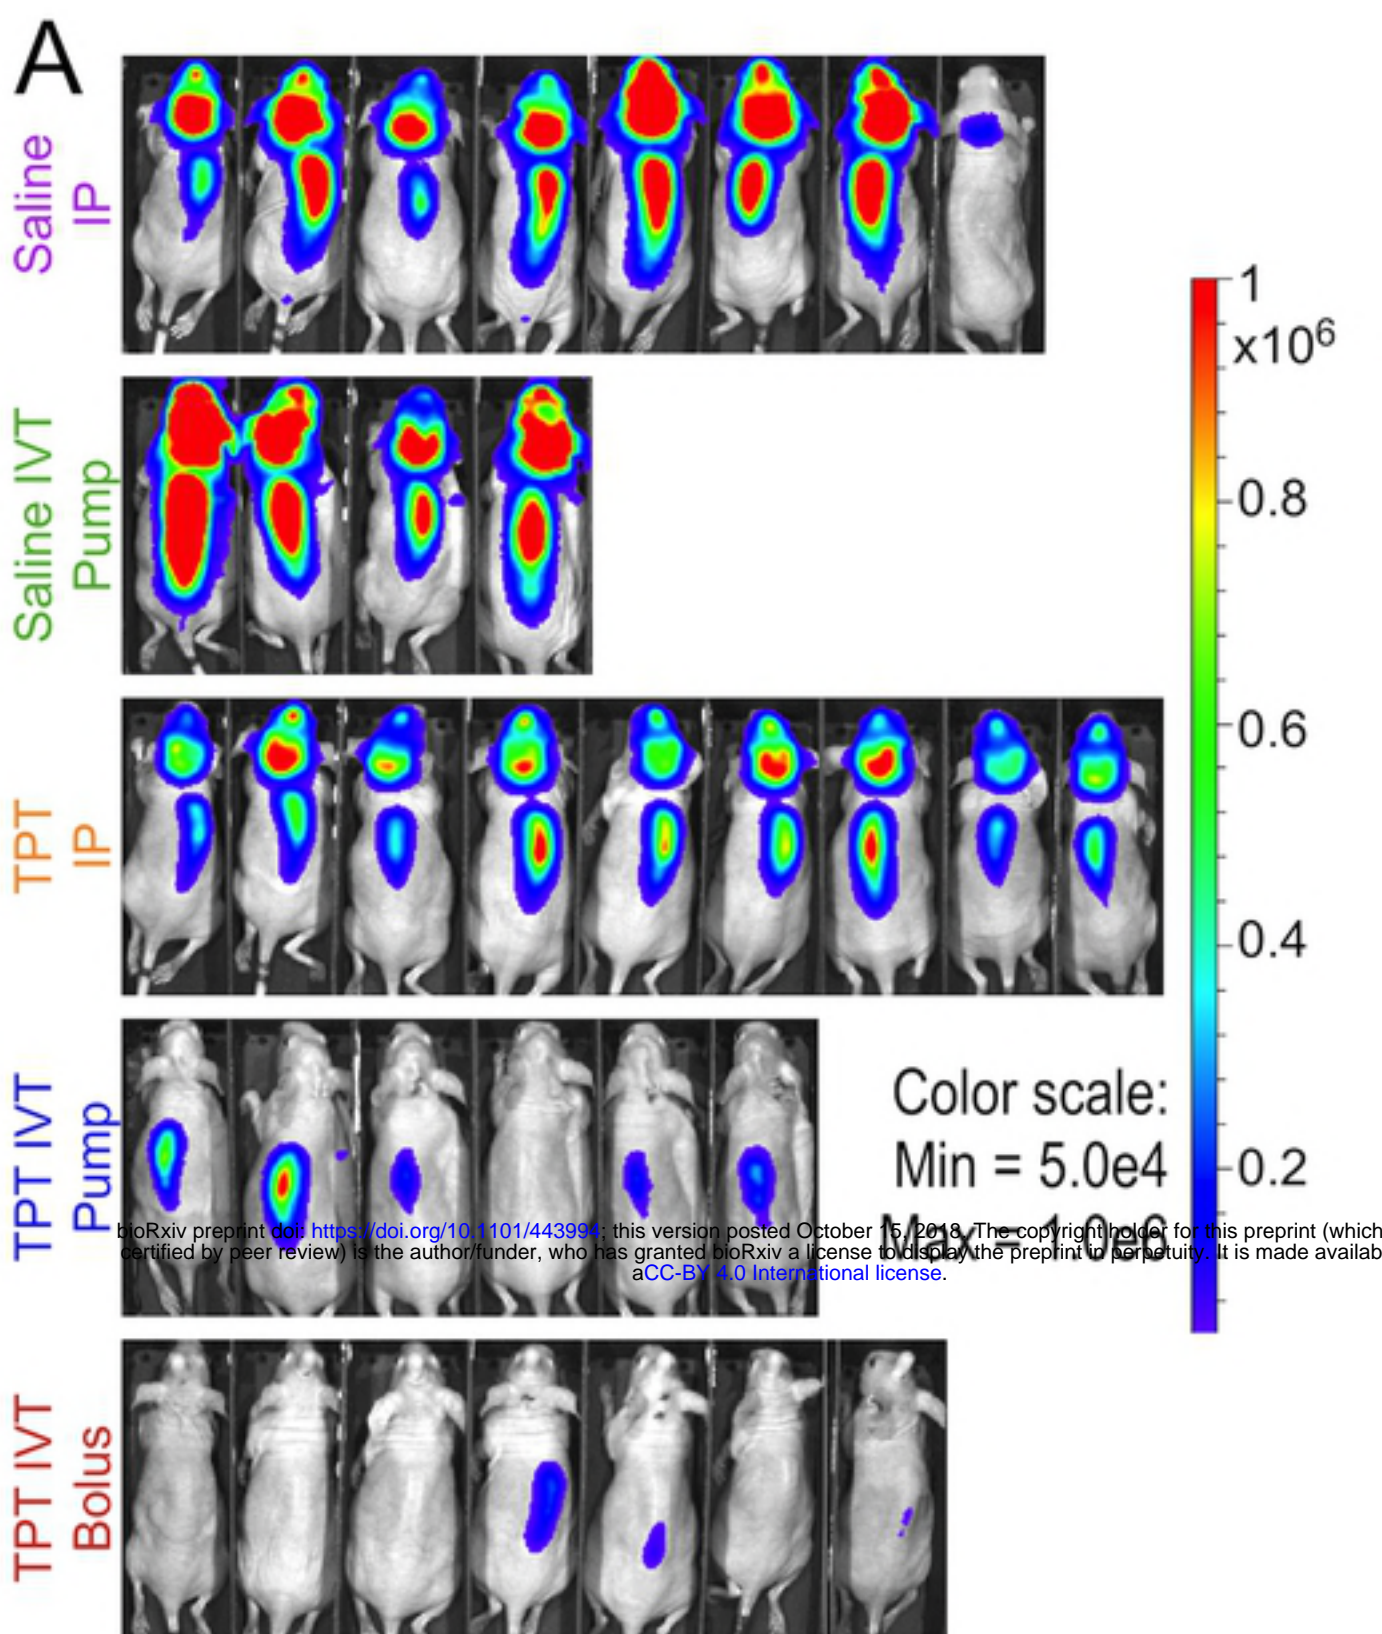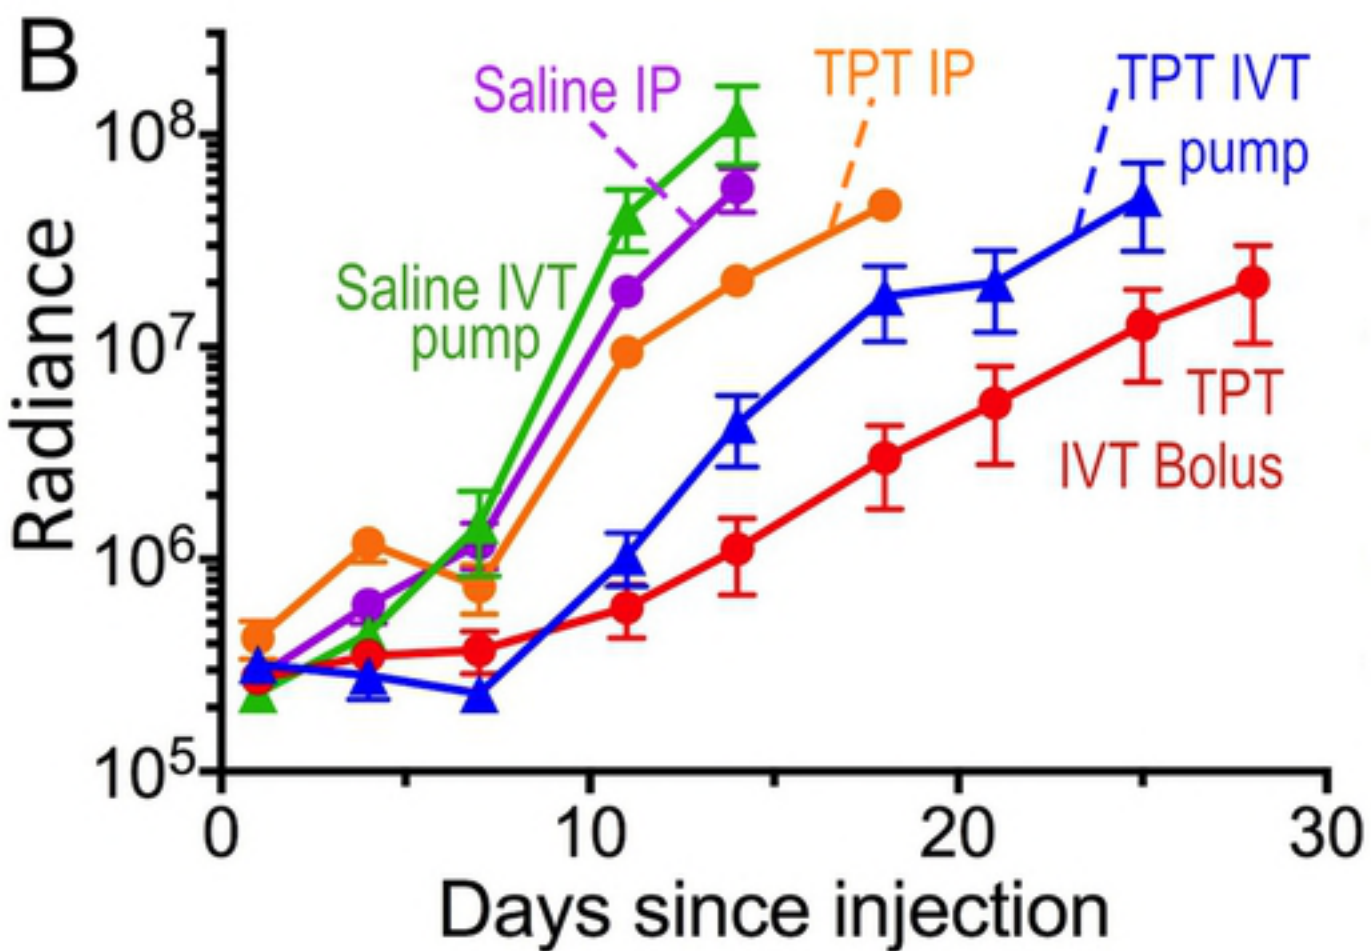

At day 14 (last imaging with all mice alive)

- Saline IP vs. TPT IP  $p=0.0117$
- Saline IVT pump vs. TPT IVT pump  $p=0.0164$
- TPT IP vs. TPT IVT bolus  $p<0.0001$
- TPT IP vs. TPT IVT pump  $p=0.0001$
- TPT IVT bolus vs. TPT IVT pump  $p=0.0619$

Figure 2



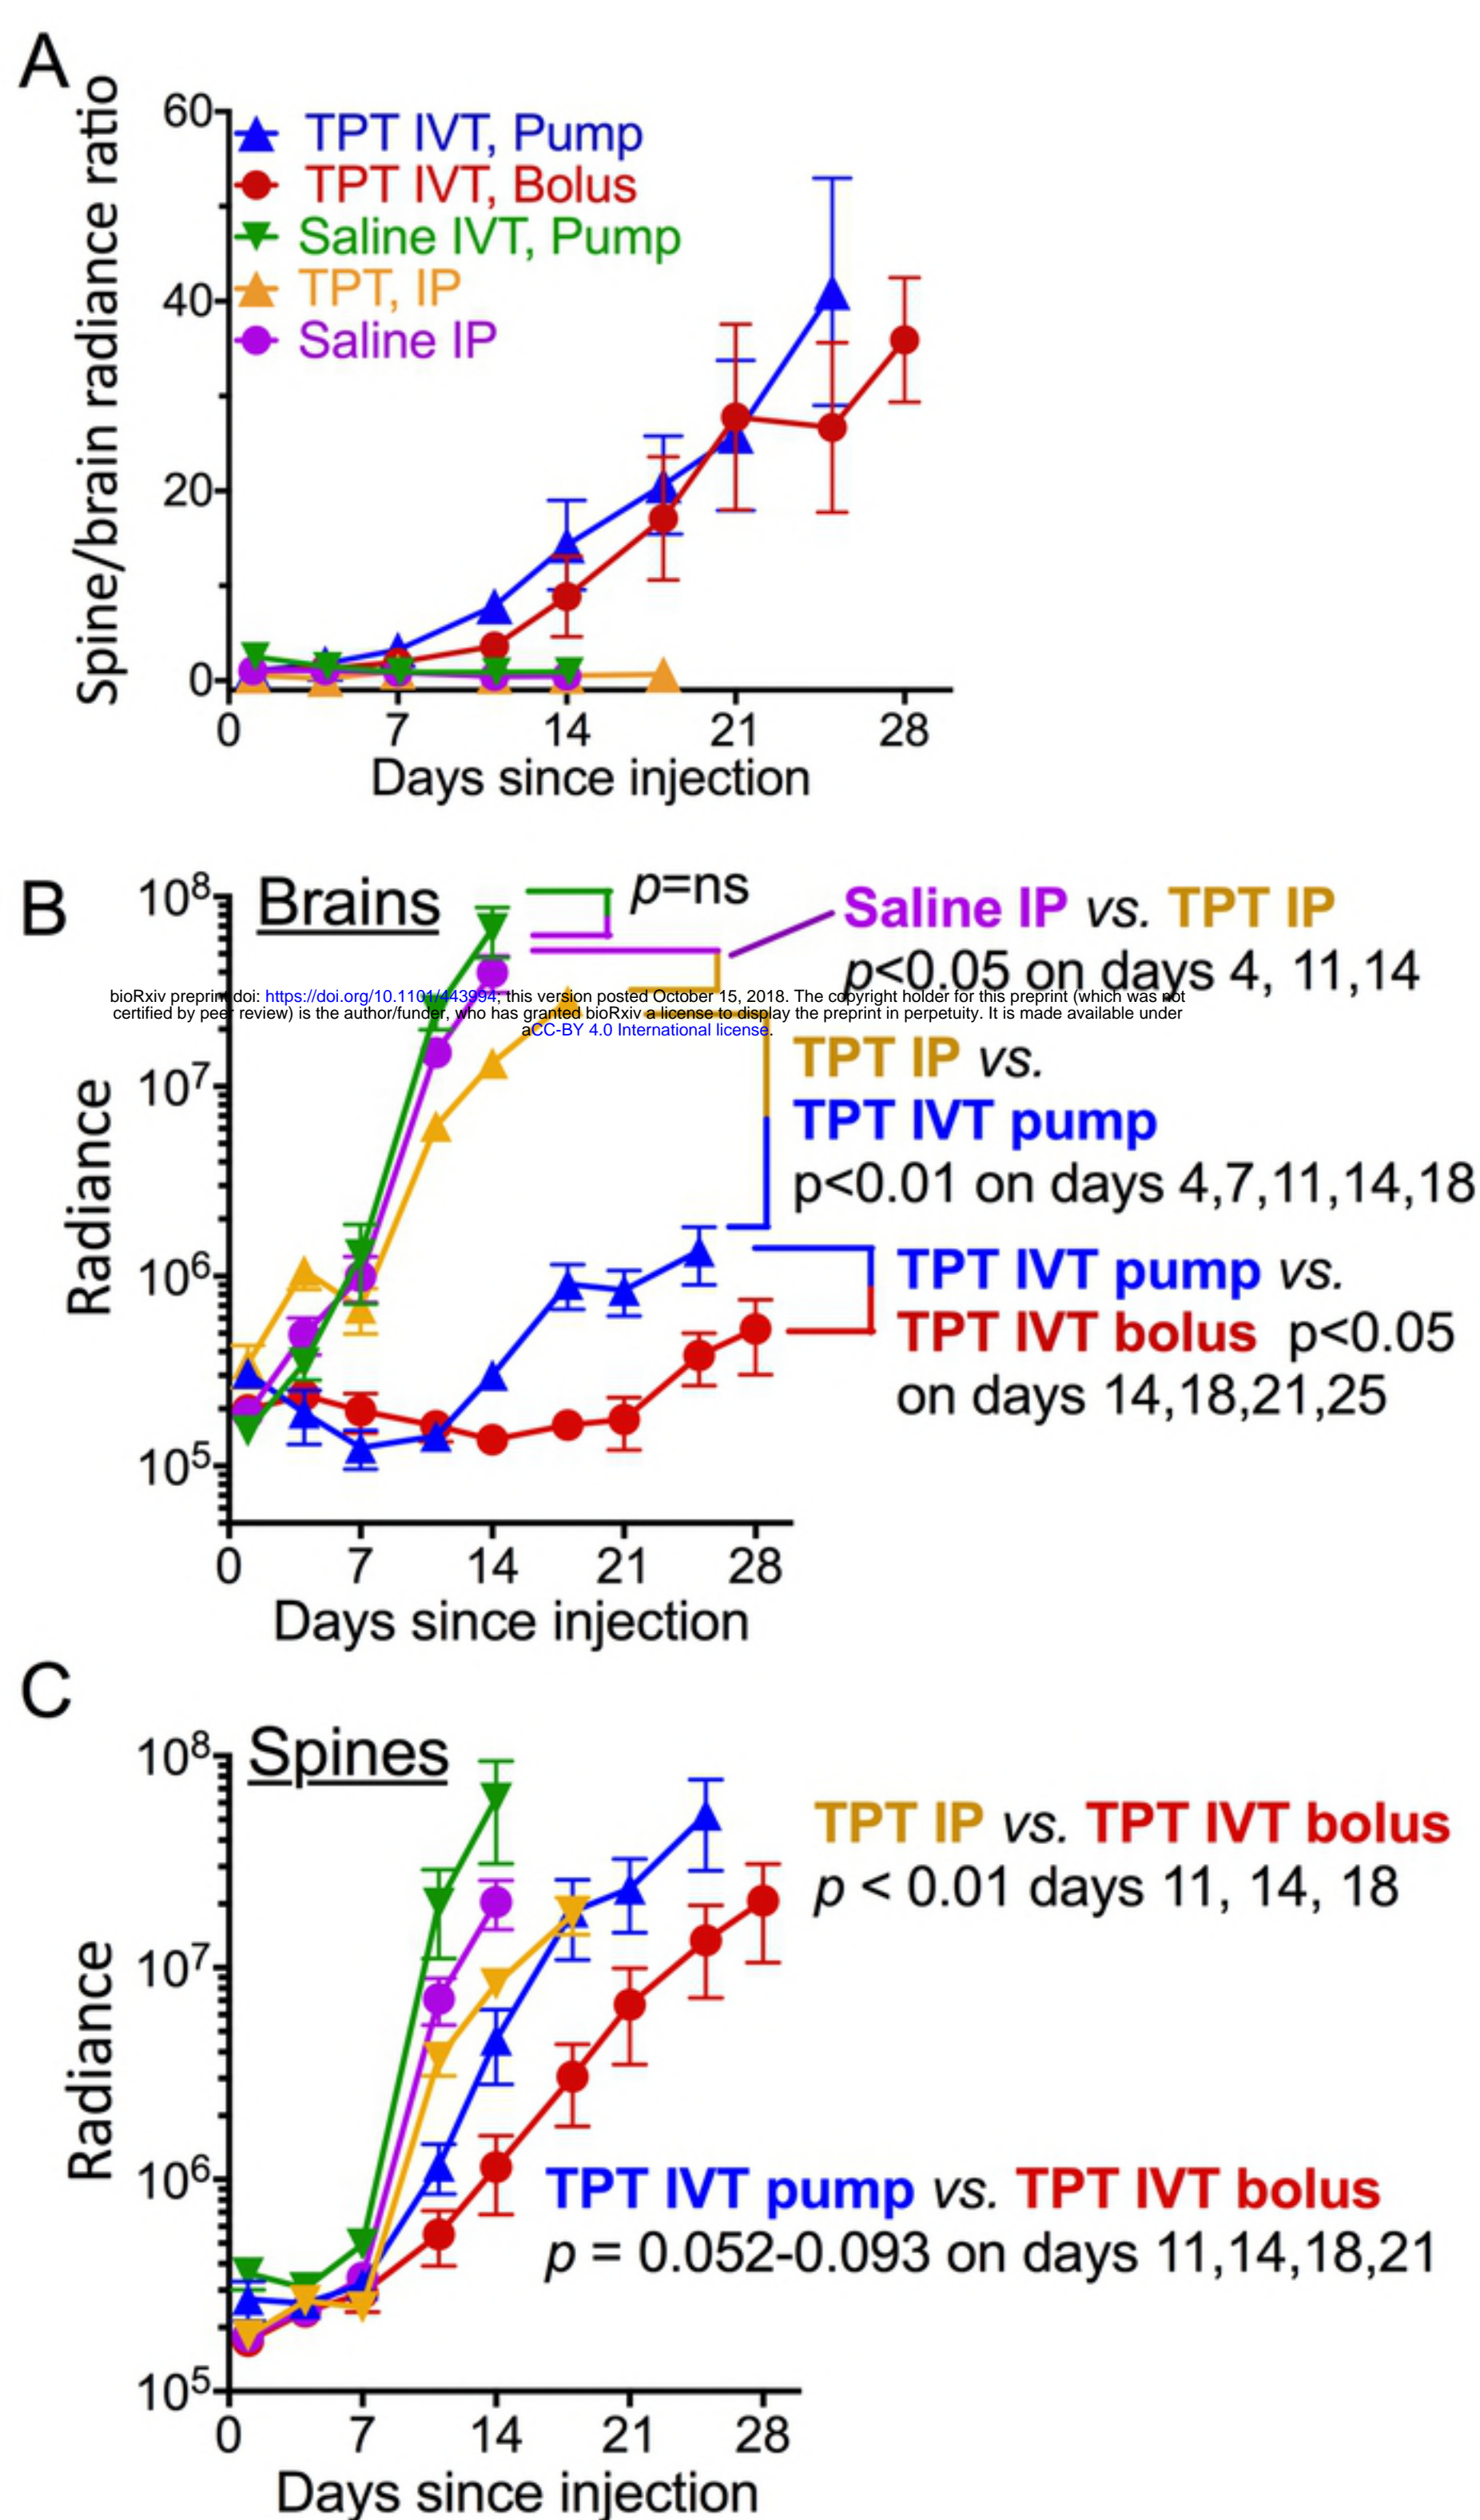

Figure 4



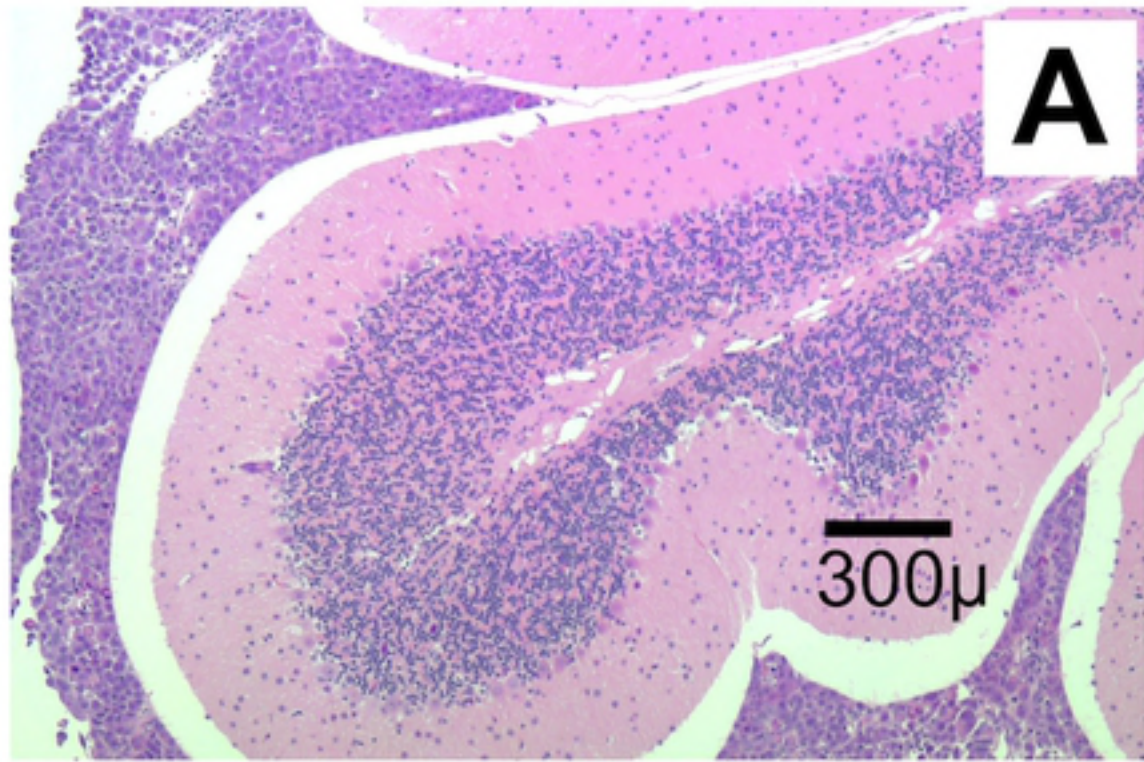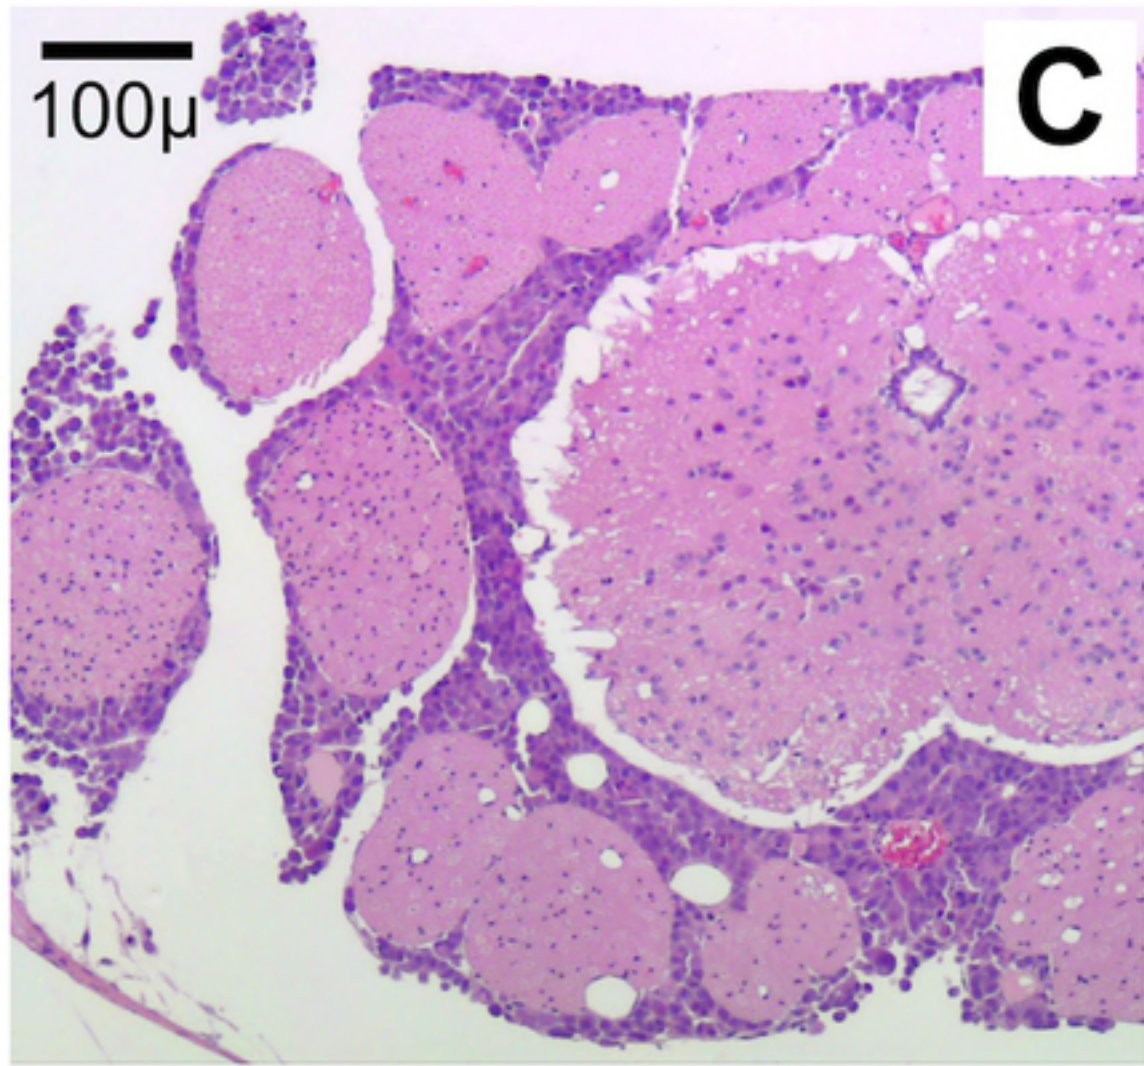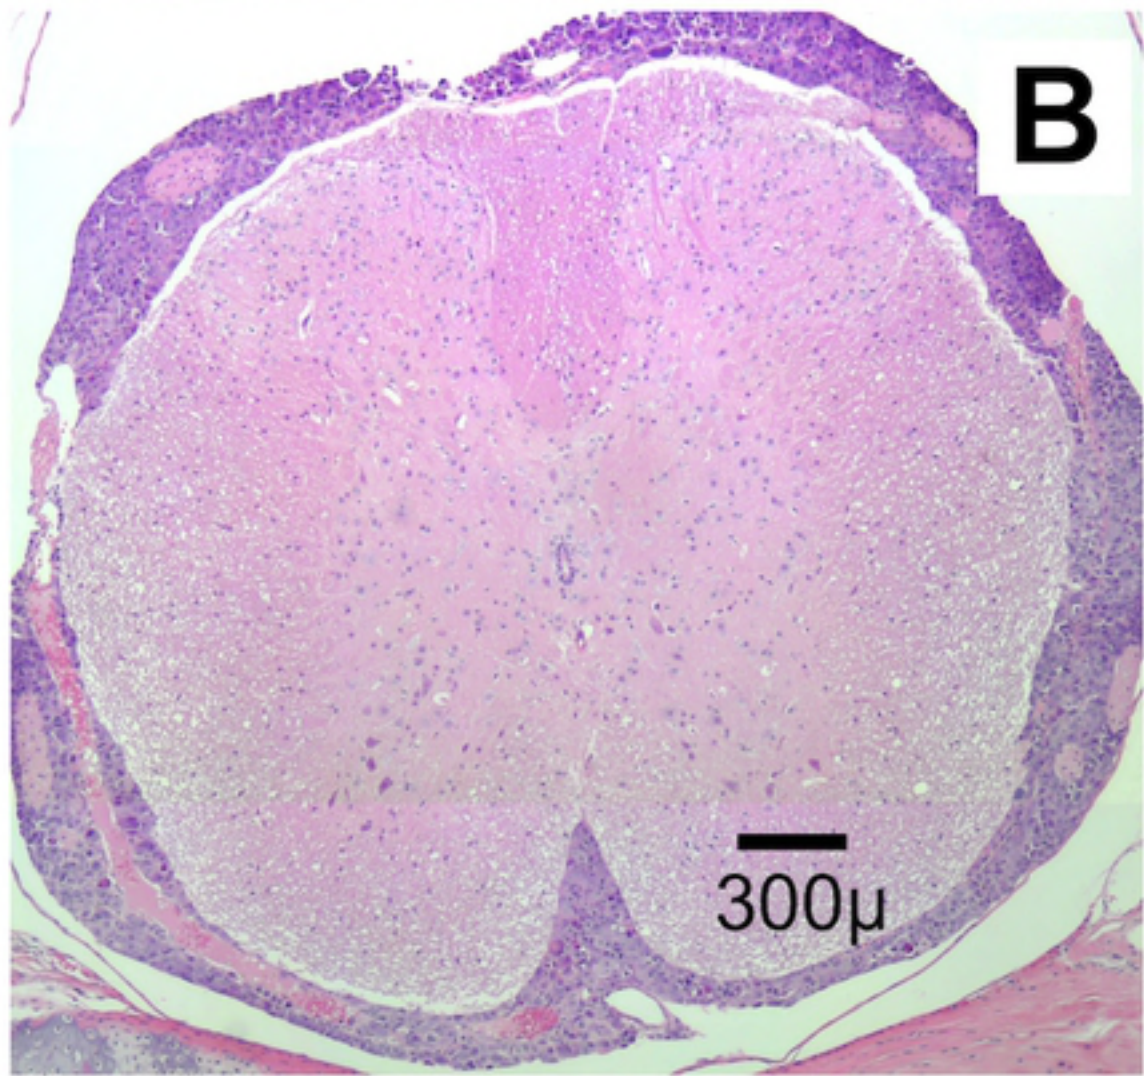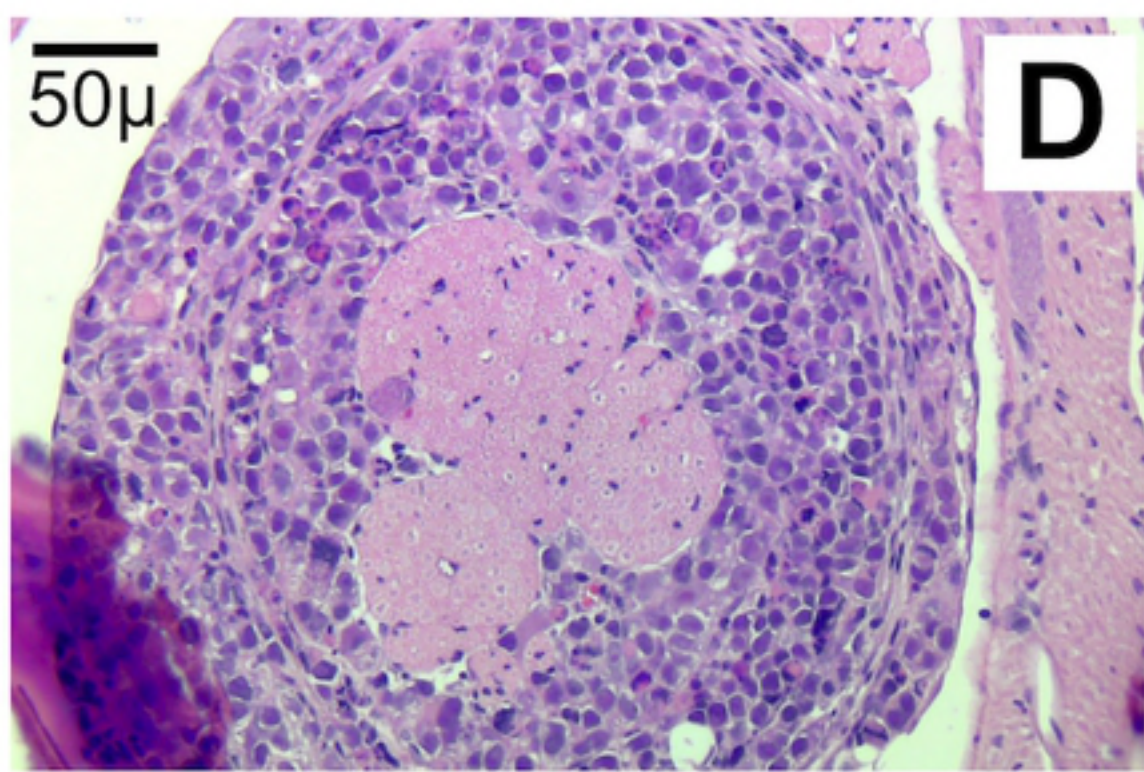

Figure 5



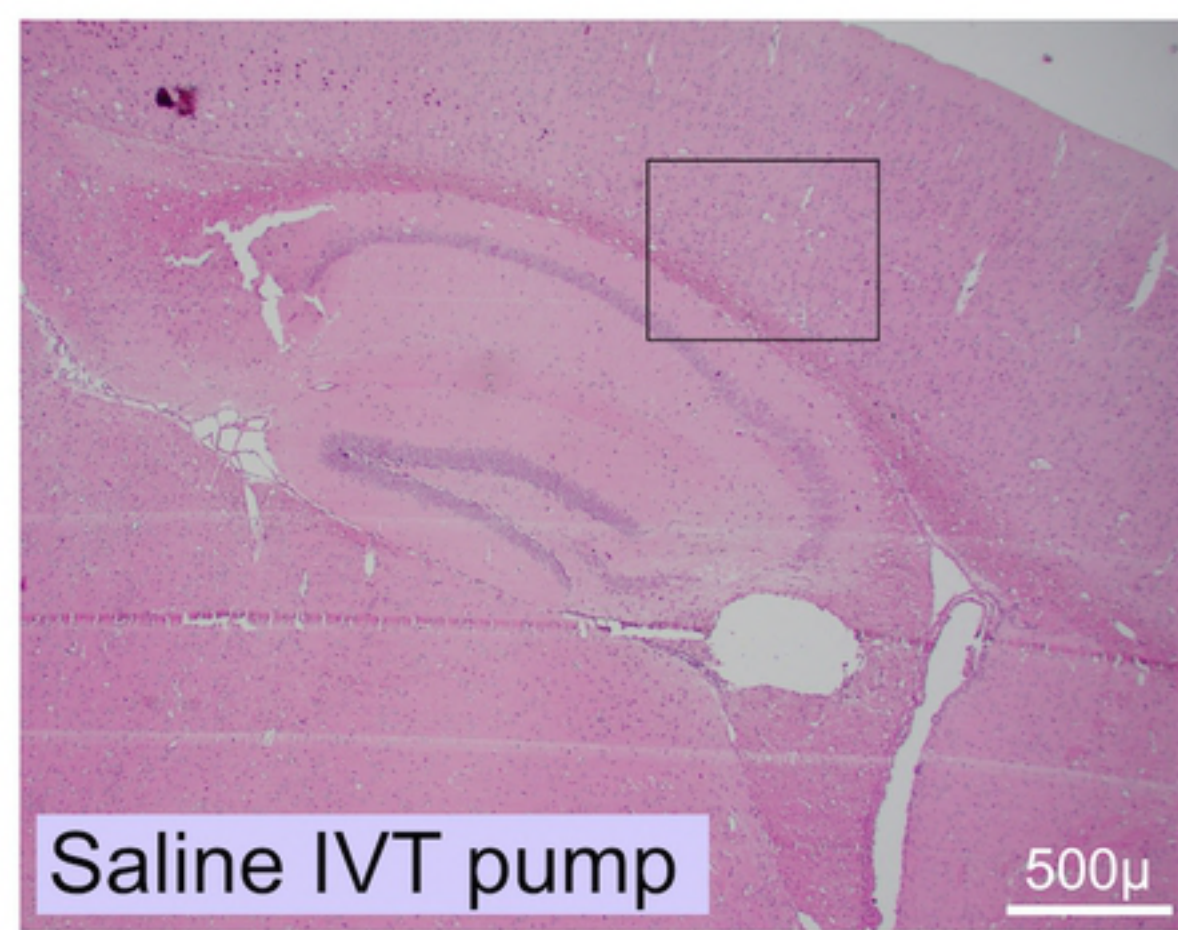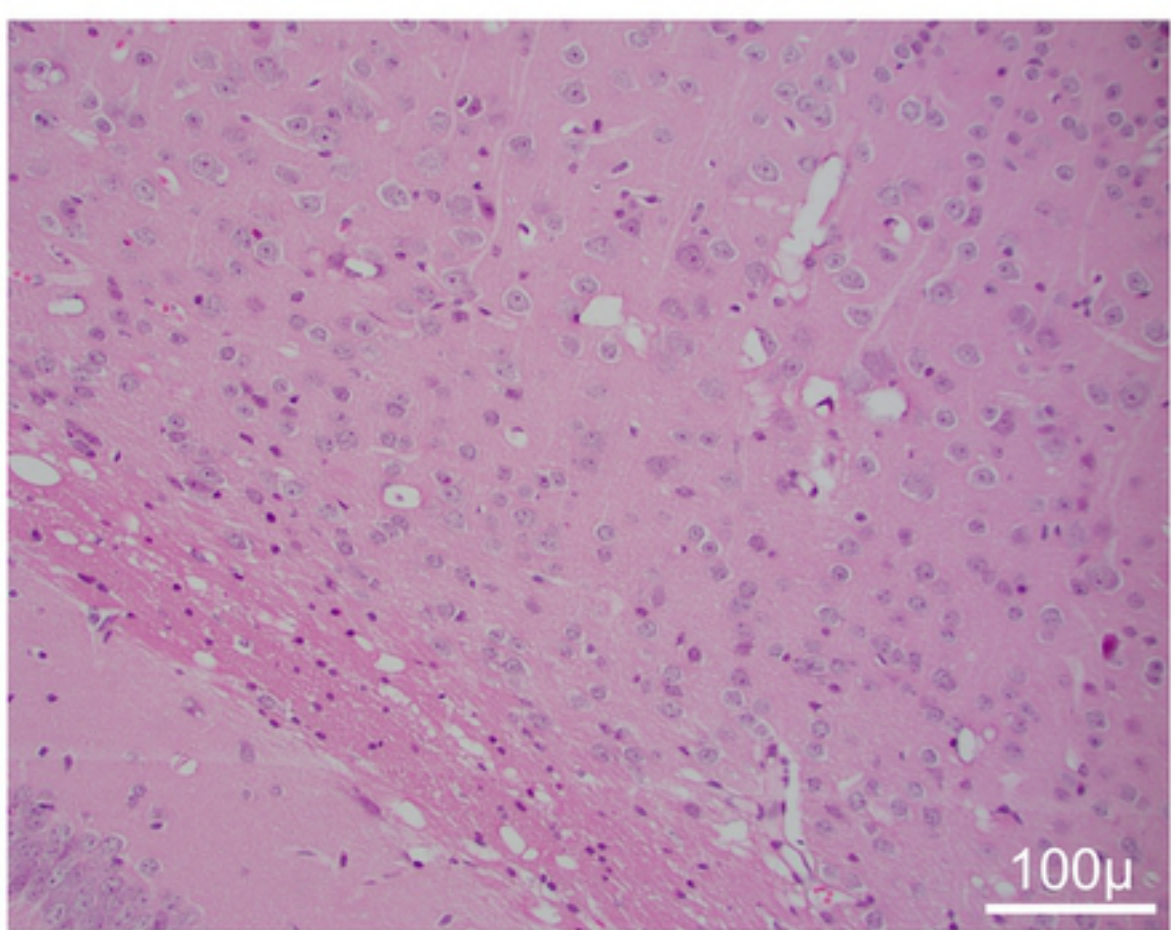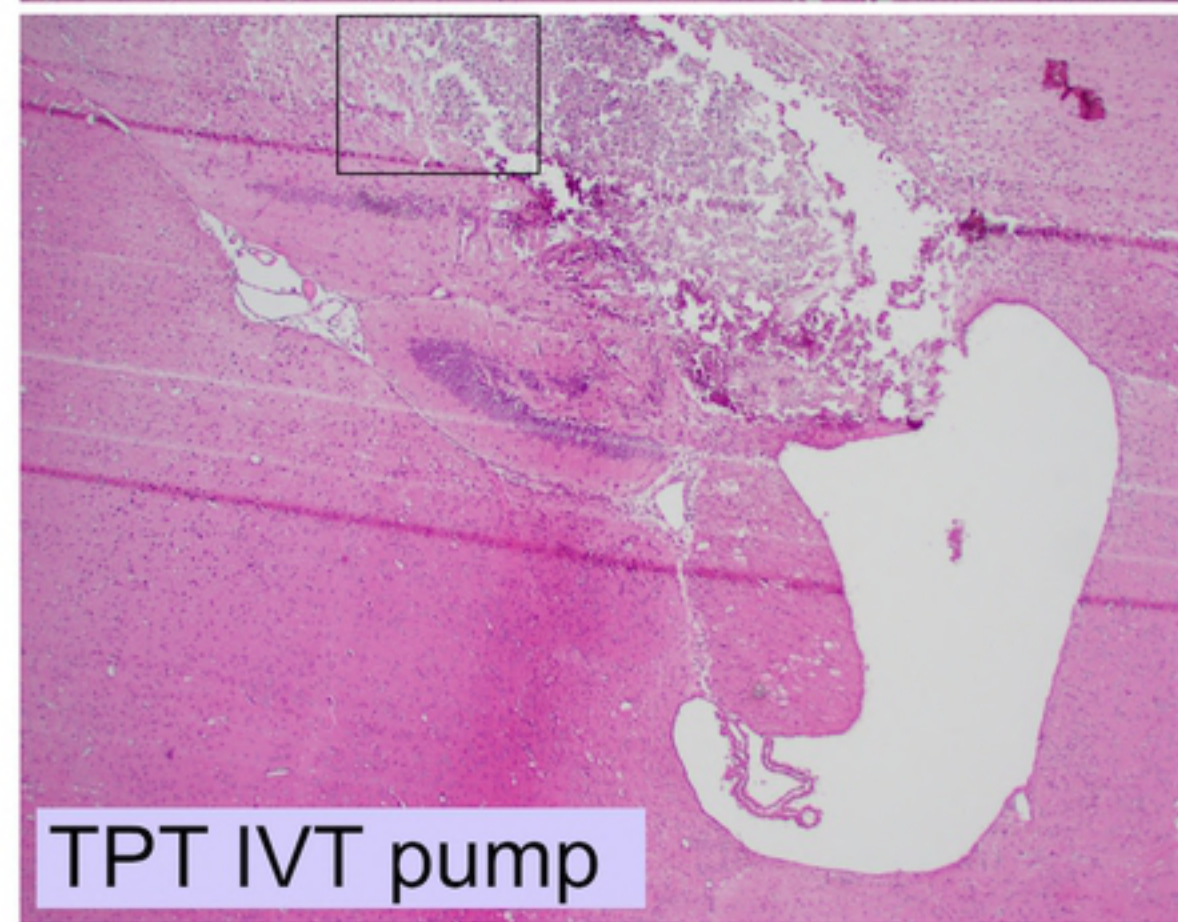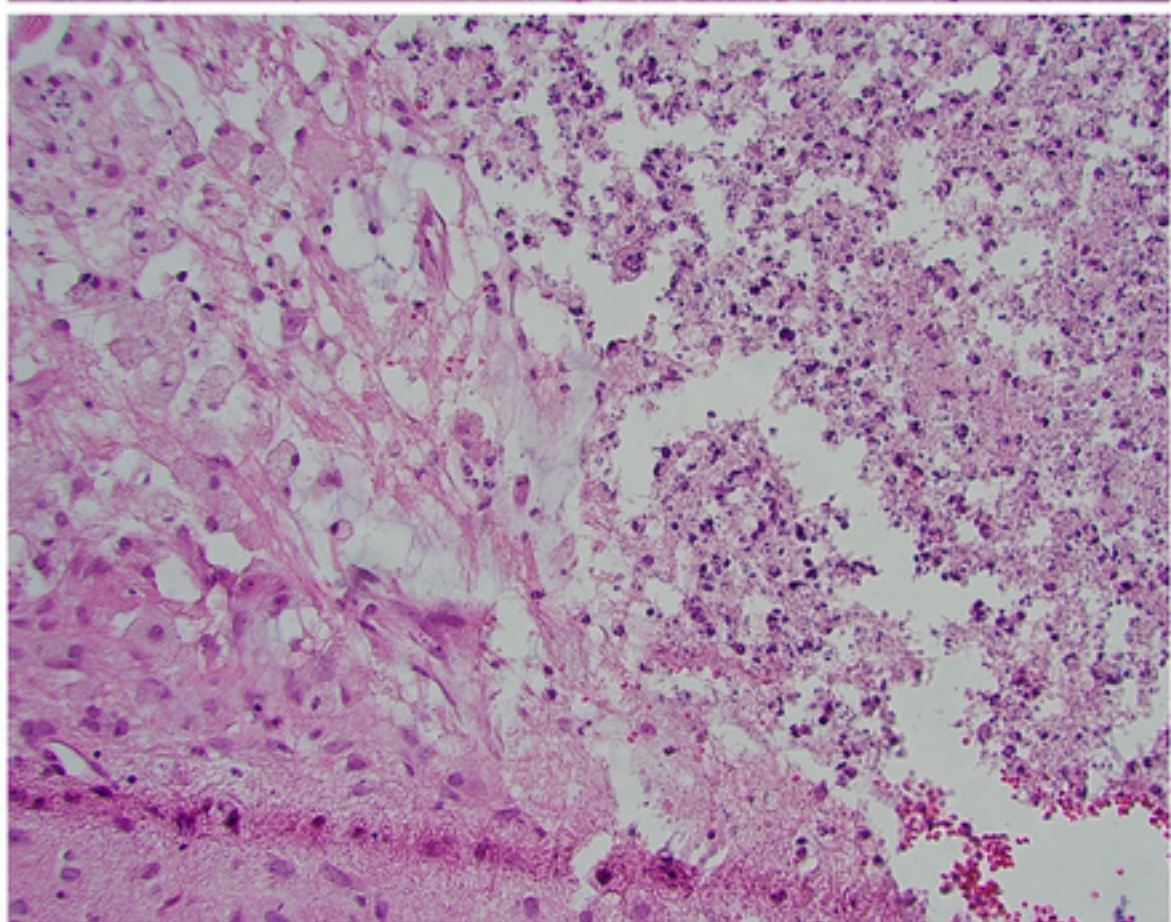

Figure 6
